# Supplementary material for: Prognostic Value of Bispectral Index Monitoring in Traumatic Brain Injury Patients Undergoing Decompressive Cranial Surgery
Source: Research Square preprint supplement (doi:10.21203/rs.3.rs-8009997/v1), 2025-12-17
Supplement: Supplementary file 1 [file bf5ae3f0189038c2bdc4bacb.xlsx]

## Sheet: bis_original
Pt. No.	등록번호	Time	AVGBIS	MINBIS	MAXBIS	AVGBISAL	AVGBISA2	AVGSQI	AVGEMG	AVGSR
23	1569141	07/07/2018 02:13:00	51	49	53	49	49	23	30	0
23	1569141	07/07/2018 02:14:00	51	47	60	48	48	85	27	0
23	1569141	07/07/2018 02:15:00	51	42	60	49	46	99	28	0
23	1569141	07/07/2018 02:16:00	47	44	50	44	44	100	27	0
23	1569141	07/07/2018 02:17:00	49	37	59	47	47	99	28	0
23	1569141	07/07/2018 02:18:00	43	36	56	42	46	98	29	0
23	1569141	07/07/2018 02:19:00	60	50	73	57	57	74	36	0
23	1569141	07/07/2018 02:20:00	20	8	75	70	69	33	39	0
23	1569141	07/07/2018 02:21:00	8	8	8	59	59	32	42	0
23	1569141	07/07/2018 02:22:00	8	8	8	63	62	25	40	0
23	1569141	07/07/2018 02:23:00	8	8	8	64	64	29	39	0
23	1569141	07/07/2018 02:24:00	8	8	8	63	63	28	40	0
23	1569141	07/07/2018 02:25:00	8	8	8	68	68	30	40	0
23	1569141	07/07/2018 02:26:00	22	8	58	63	65	29	44	0
23	1569141	07/07/2018 02:27:00	47	41	51	45	47	37	39	0
23	1569141	07/07/2018 02:28:00	52	48	59	50	51	60	42	0
23	1569141	07/07/2018 02:29:00	48	43	53	46	46	64	29	0
23	1569141	07/07/2018 02:30:00	53	47	60	50	49	82	29	0
23	1569141	07/07/2018 02:31:00	48	45	54	46	45	83	28	0
23	1569141	07/07/2018 02:32:00	48	43	53	46	45	93	29	0
23	1569141	07/07/2018 02:33:00	52	48	56	49	47	91	28	0
23	1569141	07/07/2018 02:34:00	50	44	57	47	46	100	27	0
23	1569141	07/07/2018 02:35:00	51	46	60	49	48	100	27	0
23	1569141	07/07/2018 02:36:00	53	45	60	50	48	91	27	0
23	1569141	07/07/2018 02:37:00	47	42	58	45	44	89	27	0
23	1569141	07/07/2018 02:38:00	59	55	64	57	58	96	28	0
23	1569141	07/07/2018 02:39:00	62	57	68	62	60	91	29	0
23	1569141	07/07/2018 02:40:00	60	51	68	58	56	95	28	0
23	1569141	07/07/2018 02:41:00	52	46	68	49	49	94	27	0
23	1569141	07/07/2018 02:42:00	49	44	56	47	47	97	28	0
23	1569141	07/07/2018 02:43:00	43	42	47	42	45	46	32	0
23	1569141	07/07/2018 02:44:00	255	255	255	255	255	1	29	255
23	1569141	07/07/2018 02:45:00	48	45	51	46	46	25	30	0
23	1569141	07/07/2018 02:46:00	53	46	60	50	51	54	35	0
23	1569141	07/07/2018 02:47:00	52	48	54	50	50	35	40	0
23	1569141	07/07/2018 02:48:00	52	48	56	49	49	21	31	0
23	1569141	07/07/2018 02:49:00	51	43	59	49	49	35	31	0
25	1569475	07/10/2018 21:24:00	35	8	50	44	45	37	33	0
25	1569475	07/10/2018 21:25:00	48	44	53	46	46	83	30	0
25	1569475	07/10/2018 21:26:00	51	48	55	49	50	73	42	0
25	1569475	07/10/2018 21:27:00	49	47	54	47	47	86	29	0
25	1569475	07/10/2018 21:28:00	50	44	59	48	47	92	31	0
25	1569475	07/10/2018 21:29:00	50	47	57	48	48	93	30	0
25	1569475	07/10/2018 21:30:00	51	43	56	48	48	100	30	0
25	1569475	07/10/2018 21:31:00	44	41	51	42	38	98	30	0
25	1569475	07/10/2018 21:32:00	47	44	51	45	40	100	30	0
25	1569475	07/10/2018 21:33:00	45	39	50	42	37	99	30	0
25	1569475	07/10/2018 21:34:00	42	40	45	39	31	89	31	0
25	1569475	07/10/2018 21:35:00	43	37	49	40	34	88	31	0
25	1569475	07/10/2018 21:36:00	42	39	45	40	33	94	30	0
25	1569475	07/10/2018 21:37:00	46	42	50	44	38	100	30	0
25	1569475	07/10/2018 21:38:00	50	46	54	47	42	100	30	0
25	1569475	07/10/2018 21:39:00	53	50	58	50	45	70	30	0
25	1569475	07/10/2018 21:40:00	57	50	60	54	49	33	32	0
25	1569475	07/10/2018 21:41:00	50	44	58	47	45	54	29	0
25	1569475	07/10/2018 21:42:00	44	42	54	41	41	61	29	0
25	1569475	07/10/2018 21:43:00	54	51	58	51	51	67	29	0
25	1569475	07/10/2018 21:44:00	47	44	52	45	45	57	30	0
25	1569475	07/10/2018 21:45:00	43	42	45	41	41	43	30	0
25	1569475	07/10/2018 21:46:00	41	40	43	40	40	21	30	0
25	1569475	07/10/2018 21:47:00	46	45	48	43	43	46	29	0
25	1569475	07/10/2018 21:48:00	45	42	48	43	43	42	28	0
25	1569475	07/10/2018 21:49:00	47	44	51	44	44	75	28	0
25	1569475	07/10/2018 21:50:00	44	40	48	41	41	79	27	0
25	1569475	07/10/2018 21:51:00	45	43	47	42	42	68	27	0
25	1569475	07/10/2018 21:52:00	44	42	46	42	42	30	29	0
25	1569475	07/10/2018 21:53:00	46	43	49	44	44	70	28	0
25	1569475	07/10/2018 21:54:00	41	39	45	39	38	73	27	0
25	1569475	07/10/2018 21:55:00	42	39	46	39	39	45	25	0
25	1569475	07/10/2018 21:56:00	44	42	47	42	42	89	27	0
25	1569475	07/10/2018 21:57:00	44	42	50	42	42	69	30	0
25	1569475	07/10/2018 21:58:00	43	40	48	41	41	96	29	0
25	1569475	07/10/2018 21:59:00	46	41	52	44	44	97	27	0
25	1569475	07/10/2018 22:00:00	45	40	50	42	42	67	29	0
25	1569475	07/10/2018 22:01:00	43	40	53	41	40	98	29	0
25	1569475	07/10/2018 22:02:00	40	36	44	38	37	98	28	0
25	1569475	07/10/2018 22:03:00	43	41	48	41	41	100	27	0
25	1569475	07/10/2018 22:04:00	42	37	44	39	39	100	27	0
25	1569475	07/10/2018 22:05:00	45	41	49	42	42	84	28	0
25	1569475	07/10/2018 22:06:00	43	41	51	41	41	99	28	0
25	1569475	07/10/2018 22:07:00	44	40	50	42	42	97	29	0
25	1569475	07/10/2018 22:08:00	43	40	51	41	41	97	32	0
25	1569475	07/10/2018 22:09:00	50	43	54	47	47	82	35	0
25	1569475	07/10/2018 22:10:00	44	42	50	42	42	94	28	0
25	1569475	07/10/2018 22:11:00	46	43	51	43	43	99	29	0
25	1569475	07/10/2018 22:12:00	46	42	53	43	43	98	28	0
25	1569475	07/10/2018 22:13:00	43	41	46	40	40	97	27	0
25	1569475	07/10/2018 22:14:00	43	40	48	40	40	95	27	0
25	1569475	07/10/2018 22:15:00	44	41	48	42	42	84	28	0
25	1569475	07/10/2018 22:16:00	41	39	42	38	37	85	27	0
25	1569475	07/10/2018 22:17:00	41	39	44	39	38	86	27	0
25	1569475	07/10/2018 22:18:00	42	40	45	39	39	97	27	0
25	1569475	07/10/2018 22:19:00	41	39	43	38	38	90	27	0
25	1569475	07/10/2018 22:20:00	43	41	45	40	40	96	27	0
25	1569475	07/10/2018 22:21:00	41	38	46	39	38	100	27	0
25	1569475	07/10/2018 22:22:00	42	40	45	40	40	91	28	0
25	1569475	07/10/2018 22:23:00	40	39	41	38	37	84	27	0
25	1569475	07/10/2018 22:24:00	41	40	43	39	38	64	27	0
25	1569475	07/10/2018 22:25:00	41	38	43	38	38	86	28	0
25	1569475	07/10/2018 22:26:00	42	39	48	40	39	91	27	0
25	1569475	07/10/2018 22:27:00	41	39	44	39	38	90	27	0
25	1569475	07/10/2018 22:28:00	42	39	46	40	39	97	27	0
25	1569475	07/10/2018 22:29:00	42	40	43	39	39	100	27	0
25	1569475	07/10/2018 22:30:00	42	39	45	39	39	100	27	0
25	1569475	07/10/2018 22:31:00	42	40	45	39	39	91	27	0
25	1569475	07/10/2018 22:32:00	43	41	47	41	41	62	27	0
25	1569475	07/10/2018 22:33:00	43	40	45	40	40	97	27	0
25	1569475	07/10/2018 22:34:00	42	41	43	40	40	45	29	0
25	1569475	07/10/2018 22:35:00	42	42	44	40	39	26	29	0
25	1569475	07/10/2018 22:36:00	42	41	44	40	39	53	27	0
25	1569475	07/10/2018 22:37:00	43	41	45	41	41	90	27	0
25	1569475	07/10/2018 22:38:00	45	41	50	43	43	100	30	0
25	1569475	07/10/2018 22:39:00	44	41	47	42	43	98	29	0
25	1569475	07/10/2018 22:40:00	45	40	49	42	42	99	28	0
25	1569475	07/10/2018 22:41:00	44	40	47	41	41	100	28	1
25	1569475	07/10/2018 22:42:00	44	42	48	42	42	98	29	0
25	1569475	07/10/2018 22:43:00	44	41	48	41	42	95	28	0
25	1569475	07/10/2018 22:44:00	44	41	48	42	42	99	28	0
25	1569475	07/10/2018 22:45:00	42	39	45	40	40	90	28	0
25	1569475	07/10/2018 22:46:00	46	43	50	43	43	83	28	0
25	1569475	07/10/2018 22:47:00	44	40	46	42	42	34	27	0
29	518066	07/16/2018 11:49:00	53	47	61	50	50	93	33	0
29	518066	07/16/2018 11:50:00	58	52	65	56	56	68	30	1
29	518066	07/16/2018 11:51:00	55	47	63	53	53	89	29	3
29	518066	07/16/2018 11:52:00	54	48	60	51	51	100	28	2
29	518066	07/16/2018 11:53:00	55	48	66	52	52	100	28	5
29	518066	07/16/2018 11:54:00	59	51	68	57	57	100	27	5
29	518066	07/16/2018 11:55:00	60	54	68	59	59	100	26	7
29	518066	07/16/2018 11:56:00	62	60	64	60	61	100	26	8
29	518066	07/16/2018 11:57:00	60	52	68	59	63	100	26	11
29	518066	07/16/2018 11:58:00	61	54	69	60	63	100	26	10
29	518066	07/16/2018 11:59:00	64	61	68	62	62	98	27	6
29	518066	07/16/2018 12:00:00	58	52	67	56	58	85	26	8
29	518066	07/16/2018 12:01:00	59	55	66	57	57	99	26	5
29	518066	07/16/2018 12:02:00	58	51	63	55	55	99	26	4
29	518066	07/16/2018 12:03:00	57	50	62	55	56	100	26	9
29	518066	07/16/2018 12:04:00	57	52	61	54	54	100	26	6
29	518066	07/16/2018 12:05:00	52	42	62	50	50	99	27	6
29	518066	07/16/2018 12:06:00	47	41	58	44	44	92	27	1
29	518066	07/16/2018 12:07:00	52	45	58	50	51	89	28	0
29	518066	07/16/2018 12:08:00	56	48	61	54	57	92	26	9
29	518066	07/16/2018 12:09:00	50	46	56	50	55	100	26	16
29	518066	07/16/2018 12:10:00	43	37	50	43	49	84	27	23
29	518066	07/16/2018 12:11:00	49	42	54	48	52	99	26	21
29	518066	07/16/2018 12:12:00	45	41	50	43	46	100	27	15
29	518066	07/16/2018 12:13:00	51	45	56	50	55	100	26	14
29	518066	07/16/2018 12:14:00	49	45	55	48	54	100	26	21
29	518066	07/16/2018 12:15:00	47	44	50	46	52	100	26	21
29	518066	07/16/2018 12:16:00	50	44	56	49	55	99	27	16
29	518066	07/16/2018 12:17:00	56	49	63	55	59	96	27	12
29	518066	07/16/2018 12:18:00	50	46	55	50	55	86	26	21
29	518066	07/16/2018 12:19:00	38	28	49	38	44	35	28	23
29	518066	07/16/2018 12:20:00	53	45	62	52	54	51	28	10
29	518066	07/16/2018 12:21:00	61	58	62	59	60	84	28	9
29	518066	07/16/2018 12:22:00	58	49	65	57	57	100	28	6
29	518066	07/16/2018 12:23:00	60	56	62	59	60	95	27	10
29	518066	07/16/2018 12:24:00	57	50	63	57	61	76	27	15
29	518066	07/16/2018 12:25:00	48	43	55	48	57	95	27	21
29	518066	07/16/2018 12:26:00	45	42	51	44	48	100	27	24
29	518066	07/16/2018 12:27:00	55	50	58	54	56	100	27	18
29	518066	07/16/2018 12:28:00	53	50	57	52	55	100	27	22
29	518066	07/16/2018 12:29:00	49	46	53	49	55	100	27	24
29	518066	07/16/2018 12:30:00	46	42	56	45	51	88	27	26
29	518066	07/16/2018 12:31:00	52	47	57	52	56	95	27	20
29	518066	07/16/2018 12:32:00	50	43	56	50	54	100	27	23
29	518066	07/16/2018 12:33:00	52	47	60	52	60	100	27	17
29	518066	07/16/2018 12:34:00	46	44	48	46	58	100	27	20
29	518066	07/16/2018 12:35:00	55	46	65	54	60	98	27	14
29	518066	07/16/2018 12:36:00	60	56	65	57	59	94	27	7
29	518066	07/16/2018 12:37:00	51	44	65	51	57	100	26	14
29	518066	07/16/2018 12:38:00	46	26	59	45	49	94	32	10
29	518066	07/16/2018 12:39:00	58	53	61	58	59	83	27	13
29	518066	07/16/2018 12:40:00	52	49	56	52	58	90	27	19
29	518066	07/16/2018 12:41:00	57	49	62	57	61	93	26	9
29	518066	07/16/2018 12:42:00	54	44	59	54	60	100	27	13
29	518066	07/16/2018 12:43:00	45	34	55	44	47	96	30	9
29	518066	07/16/2018 12:44:00	47	43	55	44	44	69	29	2
29	518066	07/16/2018 12:45:00	52	41	58	50	50	81	28	4
29	518066	07/16/2018 12:46:00	62	42	76	60	60	89	27	6
29	518066	07/16/2018 12:47:00	63	42	86	62	65	99	36	17
29	518066	07/16/2018 12:48:00	91	86	93	93	97	75	50	2
29	518066	07/16/2018 12:49:00	92	89	94	98	98	63	53	0
29	518066	07/16/2018 12:50:00	92	89	93	98	98	10	25	0
57	1586265	12/06/2018 09:35:00	18	13	23	18	21	89	33	58
57	1586265	12/06/2018 09:36:00	19	12	30	19	23	83	31	55
57	1586265	12/06/2018 09:37:00	21	8	30	21	25	85	27	49
57	1586265	12/06/2018 09:38:00	13	9	17	13	15	93	30	69
57	1586265	12/06/2018 09:39:00	16	13	17	16	19	93	29	63
57	1586265	12/06/2018 09:40:00	4	1	12	4	5	93	28	90
57	1586265	12/06/2018 09:41:00	14	7	17	14	17	97	27	67
57	1586265	12/06/2018 09:42:00	9	7	15	9	11	98	26	78
57	1586265	12/06/2018 09:43:00	23	13	39	23	26	96	30	52
57	1586265	12/06/2018 09:44:00	20	14	27	20	23	79	29	54
57	1586265	12/06/2018 09:45:00	11	9	15	11	13	92	29	73
57	1586265	12/06/2018 09:46:00	12	4	15	12	14	97	26	72
57	1586265	12/06/2018 09:47:00	4	1	11	4	4	98	27	91
57	1586265	12/06/2018 09:48:00	11	5	13	11	13	100	25	73
57	1586265	12/06/2018 09:49:00	3	2	7	3	3	100	26	93
57	1586265	12/06/2018 09:50:00	13	8	20	13	16	100	27	69
57	1586265	12/06/2018 09:51:00	12	7	18	12	14	100	26	72
57	1586265	12/06/2018 09:52:00	17	9	22	17	21	100	26	59
57	1586265	12/06/2018 09:53:00	7	1	19	7	8	99	26	83
57	1586265	12/06/2018 09:54:00	3	2	5	3	3	57	29	94
57	1586265	12/06/2018 09:55:00	10	4	12	10	12	79	27	77
57	1586265	12/06/2018 09:56:00	8	6	12	8	10	93	26	81
57	1586265	12/06/2018 09:57:00	14	11	16	14	17	100	26	66
57	1586265	12/06/2018 09:58:00	21	15	28	21	25	99	27	51
57	1586265	12/06/2018 09:59:00	18	8	28	17	21	63	25	59
57	1586265	12/06/2018 10:00:00	13	10	15	13	15	26	25	70
57	1586265	12/06/2018 10:01:00	255	255	255	255	255	3	25	255
57	1586265	12/06/2018 10:02:00	255	255	255	255	255	8	25	255
57	1586265	12/06/2018 10:03:00	255	255	255	255	255	8	26	255
57	1586265	12/06/2018 10:04:00	255	255	255	255	255	0	26	255
57	1586265	12/06/2018 10:05:00	21	16	23	21	25	61	26	48
57	1586265	12/06/2018 10:06:00	22	18	24	22	26	90	26	47
57	1586265	12/06/2018 10:07:00	15	9	18	15	18	67	26	64
57	1586265	12/06/2018 10:08:00	18	14	21	18	21	51	27	58
57	1586265	12/06/2018 10:09:00	9	4	18	9	11	46	27	78
57	1586265	12/06/2018 10:10:00	10	6	14	10	12	35	28	76
57	1586265	12/06/2018 10:11:00	13	7	18	13	15	68	31	70
57	1586265	12/06/2018 10:12:00	18	16	21	18	21	98	27	58
57	1586265	12/06/2018 10:13:00	27	16	45	26	30	97	31	46
57	1586265	12/06/2018 10:14:00	25	17	34	25	28	95	28	47
57	1586265	12/06/2018 10:15:00	24	17	32	24	29	54	35	42
57	1586265	12/06/2018 10:16:00	25	19	33	25	30	67	32	42
57	1586265	12/06/2018 10:17:00	12	6	19	12	14	66	31	71
57	1586265	12/06/2018 10:18:00	7	3	11	7	8	67	28	83
57	1586265	12/06/2018 10:19:00	1	0	2	1	1	85	28	97
57	1586265	12/06/2018 10:20:00	5	1	10	5	6	96	30	89
57	1586265	12/06/2018 10:21:00	11	9	13	11	13	67	32	74
57	1586265	12/06/2018 10:22:00	10	7	13	10	12	72	29	75
57	1586265	12/06/2018 10:23:00	14	10	20	14	16	92	33	68
57	1586265	12/06/2018 10:24:00	26	19	37	26	30	90	31	46
57	1586265	12/06/2018 10:25:00	16	12	21	16	19	79	31	63
57	1586265	12/06/2018 10:26:00	29	20	37	29	33	93	31	40
57	1586265	12/06/2018 10:27:00	23	19	31	23	27	99	28	49
57	1586265	12/06/2018 10:28:00	14	5	20	14	17	80	28	67
57	1586265	12/06/2018 10:29:00	8	7	10	8	10	83	29	81
57	1586265	12/06/2018 10:30:00	9	8	11	9	11	94	30	78
57	1586265	12/06/2018 10:31:00	11	8	15	11	13	96	30	75
57	1586265	12/06/2018 10:32:00	13	12	15	13	16	96	29	69
57	1586265	12/06/2018 10:33:00	16	13	19	16	19	94	30	62
57	1586265	12/06/2018 10:34:00	11	9	14	11	14	78	29	73
57	1586265	12/06/2018 10:35:00	16	10	18	16	19	74	26	63
57	1586265	12/06/2018 10:36:00	10	8	14	10	12	64	29	76
57	1586265	12/06/2018 10:37:00	16	12	21	16	19	95	29	62
57	1586265	12/06/2018 10:38:00	24	20	29	24	27	93	30	47
57	1586265	12/06/2018 10:39:00	23	20	26	23	27	95	31	47
57	1586265	12/06/2018 10:40:00	19	14	21	19	23	92	33	54
57	1586265	12/06/2018 10:41:00	12	9	15	12	14	89	28	71
57	1586265	12/06/2018 10:42:00	10	6	13	10	11	95	26	77
57	1586265	12/06/2018 10:43:00	4	2	6	4	4	100	26	91
57	1586265	12/06/2018 10:44:00	1	1	2	1	2	100	26	97
57	1586265	12/06/2018 10:45:00	2	1	3	2	3	89	27	95
57	1586265	12/06/2018 10:46:00	2	1	5	2	2	94	30	95
57	1586265	12/06/2018 10:47:00	26	6	57	26	29	91	43	52
57	1586265	12/06/2018 10:48:00	52	35	67	52	55	75	37	12
57	1586265	12/06/2018 10:49:00	33	16	40	32	33	99	31	32
57	1586265	12/06/2018 10:50:00	6	0	16	6	7	100	27	87
57	1586265	12/06/2018 10:51:00	7	1	15	7	9	100	29	82
57	1586265	12/06/2018 10:52:00	11	6	15	11	14	100	27	73
57	1586265	12/06/2018 10:53:00	14	7	18	14	17	100	28	66
57	1586265	12/06/2018 10:54:00	8	2	18	8	10	98	27	80
57	1586265	12/06/2018 10:55:00	1	0	2	1	1	70	28	98
57	1586265	12/06/2018 10:56:00	1	1	3	1	2	90	26	97
67	1593468	02/04/2019 17:10:00	19	12	31	19	22	43	31	55
67	1593468	02/04/2019 17:11:00	13	8	17	13	15	94	28	70
67	1593468	02/04/2019 17:12:00	7	1	15	7	8	98	27	83
67	1593468	02/04/2019 17:13:00	1	0	1	1	1	100	27	98
67	1593468	02/04/2019 17:14:00	1	0	5	1	1	100	27	97
67	1593468	02/04/2019 17:15:00	15	6	19	15	18	100	29	63
67	1593468	02/04/2019 17:16:00	13	9	17	13	15	100	27	70
67	1593468	02/04/2019 17:17:00	14	8	18	14	17	100	28	66
67	1593468	02/04/2019 17:18:00	19	11	38	19	22	98	33	57
67	1593468	02/04/2019 17:19:00	23	8	40	23	26	98	28	52
67	1593468	02/04/2019 17:20:00	5	2	7	5	6	84	27	88
67	1593468	02/04/2019 17:21:00	9	6	12	9	10	98	28	79
67	1593468	02/04/2019 17:22:00	14	12	16	14	17	99	28	66
67	1593468	02/04/2019 17:23:00	13	10	16	13	15	98	28	69
67	1593468	02/04/2019 17:24:00	17	13	22	17	20	79	27	60
67	1593468	02/04/2019 17:25:00	10	6	15	10	12	87	27	77
67	1593468	02/04/2019 17:26:00	18	11	23	18	21	100	27	58
67	1593468	02/04/2019 17:27:00	17	15	20	17	20	100	28	59
67	1593468	02/04/2019 17:28:00	11	6	15	11	13	100	29	74
67	1593468	02/04/2019 17:29:00	27	15	35	26	29	95	28	40
67	1593468	02/04/2019 17:30:00	28	24	34	26	23	81	29	15
67	1593468	02/04/2019 17:31:00	39	27	45	37	36	99	27	0
67	1593468	02/04/2019 17:32:00	43	41	46	41	38	100	28	0
67	1593468	02/04/2019 17:33:00	27	9	42	26	28	100	27	44
67	1593468	02/04/2019 17:34:00	12	8	21	12	14	97	31	72
67	1593468	02/04/2019 17:35:00	32	23	36	32	36	90	30	31
67	1593468	02/04/2019 17:36:00	27	20	32	27	31	95	28	41
67	1593468	02/04/2019 17:37:00	30	19	40	29	32	96	29	36
67	1593468	02/04/2019 17:38:00	23	21	27	23	28	100	27	25
67	1593468	02/04/2019 17:39:00	25	21	31	24	29	92	42	17
67	1593468	02/04/2019 17:40:00	26	21	33	25	28	19	57	16
69	1594118	02/10/2019 14:42:00	26	14	37	26	29	67	32	44
69	1594118	02/10/2019 14:43:00	14	6	28	14	16	100	29	68
69	1594118	02/10/2019 14:44:00	4	3	7	4	5	100	30	91
69	1594118	02/10/2019 14:45:00	12	2	27	12	14	96	36	73
69	1594118	02/10/2019 14:46:00	29	21	36	28	31	89	37	42
69	1594118	02/10/2019 14:47:00	31	25	37	31	35	91	37	35
69	1594118	02/10/2019 14:48:00	21	11	37	21	24	75	36	55
69	1594118	02/10/2019 14:49:00	12	8	14	12	14	73	42	72
69	1594118	02/10/2019 14:50:00	11	10	13	11	13	90	36	74
69	1594118	02/10/2019 14:51:00	8	7	12	8	10	97	27	80
69	1594118	02/10/2019 14:52:00	3	0	7	3	3	84	26	94
69	1594118	02/10/2019 14:53:00	0	0	1	0	1	100	24	99
69	1594118	02/10/2019 14:54:00	0	0	1	0	0	100	25	99
69	1594118	02/10/2019 14:55:00	8	0	16	8	10	90	28	80
69	1594118	02/10/2019 14:56:00	14	11	19	14	17	85	32	66
69	1594118	02/10/2019 14:57:00	20	13	25	20	25	74	26	52
69	1594118	02/10/2019 14:58:00	6	2	13	6	7	92	26	85
69	1594118	02/10/2019 14:59:00	19	10	23	19	23	77	39	50
69	1594118	02/10/2019 15:00:00	19	14	23	19	24	85	28	53
69	1594118	02/10/2019 15:01:00	11	7	14	11	13	98	27	74
69	1594118	02/10/2019 15:02:00	5	1	8	5	6	85	29	87
69	1594118	02/10/2019 15:03:00	1	0	3	1	2	87	27	97
69	1594118	02/10/2019 15:04:00	4	3	4	4	4	87	27	91
69	1594118	02/10/2019 15:05:00	9	2	15	9	11	99	28	78
69	1594118	02/10/2019 15:06:00	13	10	16	13	16	78	28	68
69	1594118	02/10/2019 15:07:00	22	15	30	22	27	99	32	47
69	1594118	02/10/2019 15:08:00	28	25	33	28	36	80	36	13
69	1594118	02/10/2019 15:09:00	14	1	34	14	17	55	27	64
69	1594118	02/10/2019 15:10:00	3	2	8	3	4	50	26	92
69	1594118	02/10/2019 15:11:00	11	9	14	11	13	11	29	73
69	1594118	02/10/2019 15:12:00	13	11	15	13	15	22	27	70
69	1594118	02/10/2019 15:13:00	20	18	22	20	24	5	28	53
69	1594118	02/10/2019 15:14:00	18	14	22	18	22	52	29	56
69	1594118	02/10/2019 15:15:00	24	16	39	23	27	48	34	47
69	1594118	02/10/2019 15:16:00	14	11	17	14	17	86	34	66
69	1594118	02/10/2019 15:17:00	24	18	35	24	28	33	32	44
69	1594118	02/10/2019 15:18:00	24	21	27	24	29	63	30	44
69	1594118	02/10/2019 15:19:00	16	10	21	16	19	72	32	62
69	1594118	02/10/2019 15:20:00	10	9	11	10	12	11	38	76
69	1594118	02/10/2019 15:21:00	30	26	33	30	36	27	43	28
69	1594118	02/10/2019 15:22:00	19	15	26	19	22	59	41	55
69	1594118	02/10/2019 15:23:00	15	11	26	15	18	61	42	65
69	1594118	02/10/2019 15:24:00	255	255	255	255	255	6	39	255
69	1594118	02/10/2019 15:25:00	18	11	24	18	21	64	41	58
69	1594118	02/10/2019 15:26:00	36	25	47	36	41	89	45	35
69	1594118	02/10/2019 15:27:00	63	47	72	63	68	63	45	13
69	1594118	02/10/2019 15:28:00	41	28	61	41	44	61	43	34
69	1594118	02/10/2019 15:29:00	30	23	38	29	33	64	40	40
69	1594118	02/10/2019 15:30:00	29	21	39	29	33	93	41	42
69	1594118	02/10/2019 15:31:00	23	19	29	23	27	92	47	47
69	1594118	02/10/2019 15:32:00	34	30	38	34	38	88	43	33
69	1594118	02/10/2019 15:33:00	38	34	41	38	41	88	38	32
69	1594118	02/10/2019 15:34:00	22	17	35	22	26	48	39	51
69	1594118	02/10/2019 15:35:00	45	30	70	47	52	24	43	27
69	1594118	02/10/2019 15:36:00	34	20	49	34	40	79	42	40
69	1594118	02/10/2019 15:37:00	49	43	54	49	54	94	38	24
69	1594118	02/10/2019 15:38:00	44	39	48	45	54	90	41	17
69	1594118	02/10/2019 15:39:00	40	32	46	40	44	87	38	28
69	1594118	02/10/2019 15:40:00	23	16	35	23	26	91	42	52
69	1594118	02/10/2019 15:41:00	26	17	36	26	31	96	37	46
69	1594118	02/10/2019 15:42:00	27	20	42	27	31	93	40	46
69	1594118	02/10/2019 15:43:00	38	24	47	38	43	75	39	34
69	1594118	02/10/2019 15:44:00	22	17	24	22	26	52	37	48
69	1594118	02/10/2019 15:45:00	19	15	24	19	22	93	38	55
69	1594118	02/10/2019 15:46:00	34	16	55	34	38	91	38	40
69	1594118	02/10/2019 15:47:00	51	36	65	51	54	50	38	19
69	1594118	02/10/2019 15:48:00	39	32	45	39	42	81	36	36
69	1594118	02/10/2019 15:49:00	51	39	56	50	53	97	39	23
69	1594118	02/10/2019 15:50:00	38	20	58	38	41	97	36	36
69	1594118	02/10/2019 15:51:00	18	15	20	18	22	96	35	57
69	1594118	02/10/2019 15:52:00	14	12	17	14	17	96	33	66
69	1594118	02/10/2019 15:53:00	11	8	15	11	14	100	30	73
69	1594118	02/10/2019 15:54:00	9	3	21	9	11	89	38	78
69	1594118	02/10/2019 15:55:00	45	24	53	45	53	86	42	31
69	1594118	02/10/2019 15:56:00	32	18	46	32	38	96	35	41
69	1594118	02/10/2019 15:57:00	15	13	18	15	18	100	33	64
69	1594118	02/10/2019 15:58:00	15	13	18	15	18	100	33	63
69	1594118	02/10/2019 15:59:00	15	13	18	15	18	100	34	64
69	1594118	02/10/2019 16:00:00	18	14	20	18	22	97	36	56
69	1594118	02/10/2019 16:01:00	13	9	18	13	16	98	33	69
69	1594118	02/10/2019 16:02:00	13	9	19	13	16	94	38	68
69	1594118	02/10/2019 16:03:00	20	15	30	20	23	97	44	56
69	1594118	02/10/2019 16:04:00	15	11	20	15	18	88	38	64
69	1594118	02/10/2019 16:05:00	18	11	23	18	21	89	32	57
69	1594118	02/10/2019 16:06:00	6	2	11	6	7	100	31	86
69	1594118	02/10/2019 16:07:00	10	3	29	10	12	100	39	76
69	1594118	02/10/2019 16:08:00	31	15	44	31	40	94	35	45
69	1594118	02/10/2019 16:09:00	21	10	46	21	24	98	38	56
69	1594118	02/10/2019 16:10:00	56	43	65	56	57	96	37	19
69	1594118	02/10/2019 16:11:00	28	18	44	28	32	96	34	45
69	1594118	02/10/2019 16:12:00	14	11	21	14	17	95	33	66
69	1594118	02/10/2019 16:13:00	10	9	11	10	12	100	34	76
69	1594118	02/10/2019 16:14:00	7	6	9	7	8	94	34	83
69	1594118	02/10/2019 16:15:00	13	10	18	13	15	88	34	70
69	1594118	02/10/2019 16:16:00	29	17	41	29	33	100	36	45
69	1594118	02/10/2019 16:17:00	20	16	34	20	24	100	38	54
69	1594118	02/10/2019 16:18:00	26	18	39	26	31	98	37	47
69	1594118	02/10/2019 16:19:00	42	28	52	42	50	99	42	33
69	1594118	02/10/2019 16:20:00	22	14	37	22	26	98	37	55
69	1594118	02/10/2019 16:21:00	11	6	14	11	14	100	35	73
69	1594118	02/10/2019 16:22:00	7	4	14	7	9	100	38	82
69	1594118	02/10/2019 16:23:00	16	14	19	16	20	96	37	61
69	1594118	02/10/2019 16:24:00	19	16	21	19	22	88	43	56
69	1594118	02/10/2019 16:25:00	17	15	20	17	20	80	38	60
69	1594118	02/10/2019 16:26:00	14	9	19	14	16	98	34	68
69	1594118	02/10/2019 16:27:00	6	4	9	6	7	100	33	87
69	1594118	02/10/2019 16:28:00	10	5	15	10	12	96	38	76
69	1594118	02/10/2019 16:29:00	9	2	15	9	10	94	30	79
69	1594118	02/10/2019 16:30:00	4	2	5	4	5	100	31	90
69	1594118	02/10/2019 16:31:00	1	0	4	1	2	100	29	97
69	1594118	02/10/2019 16:32:00	2	0	3	2	2	100	31	96
69	1594118	02/10/2019 16:33:00	3	1	4	3	4	100	31	93
69	1594118	02/10/2019 16:34:00	4	2	5	4	5	99	31	90
69	1594118	02/10/2019 16:35:00	5	3	6	5	6	84	31	87
69	1594118	02/10/2019 16:36:00	4	2	5	4	4	100	32	91
69	1594118	02/10/2019 16:37:00	10	5	13	10	12	100	31	77
69	1594118	02/10/2019 16:38:00	6	1	13	6	7	100	29	85
69	1594118	02/10/2019 16:39:00	3	1	5	3	4	100	31	92
69	1594118	02/10/2019 16:40:00	6	4	9	6	7	100	31	85
69	1594118	02/10/2019 16:41:00	1	0	5	1	2	100	30	97
69	1594118	02/10/2019 16:42:00	1	0	1	1	2	100	29	97
69	1594118	02/10/2019 16:43:00	1	1	1	1	1	100	28	98
69	1594118	02/10/2019 16:44:00	1	0	1	1	1	100	28	99
69	1594118	02/10/2019 16:45:00	0	0	1	0	0	84	29	99
69	1594118	02/10/2019 16:46:00	1	0	3	1	1	99	31	97
69	1594118	02/10/2019 16:47:00	4	3	5	4	5	100	32	90
69	1594118	02/10/2019 16:48:00	2	0	4	2	3	100	29	95
69	1594118	02/10/2019 16:49:00	0	0	0	0	0	100	28	100
69	1594118	02/10/2019 16:50:00	0	0	1	0	0	100	28	99
69	1594118	02/10/2019 16:51:00	2	1	3	2	2	100	30	95
69	1594118	02/10/2019 16:52:00	2	2	3	2	3	100	30	95
69	1594118	02/10/2019 16:53:00	7	3	10	7	9	100	32	83
69	1594118	02/10/2019 16:54:00	6	1	9	6	7	67	30	86
69	1594118	02/10/2019 16:55:00	5	4	6	5	6	11	31	88
69	1594118	02/10/2019 16:56:00	8	0	10	8	10	22	33	80
69	1594118	02/10/2019 16:57:00	11	6	14	11	13	94	31	75
69	1594118	02/10/2019 16:58:00	4	0	9	4	5	100	34	91
69	1594118	02/10/2019 16:59:00	12	9	16	12	14	100	31	71
69	1594118	02/10/2019 17:00:00	3	0	9	3	4	100	28	92
69	1594118	02/10/2019 17:01:00	4	1	6	4	5	100	31	91
69	1594118	02/10/2019 17:02:00	8	4	11	8	10	100	32	80
69	1594118	02/10/2019 17:03:00	11	7	16	11	13	99	33	73
69	1594118	02/10/2019 17:04:00	14	9	16	14	16	98	29	68
69	1594118	02/10/2019 17:05:00	6	3	9	6	8	95	30	85
69	1594118	02/10/2019 17:06:00	11	6	15	11	13	83	32	74
69	1594118	02/10/2019 17:07:00	6	3	10	6	7	95	28	86
69	1594118	02/10/2019 17:08:00	6	3	9	6	7	100	29	86
69	1594118	02/10/2019 17:09:00	10	7	12	10	12	97	30	77
69	1594118	02/10/2019 17:10:00	10	7	13	10	11	100	28	77
69	1594118	02/10/2019 17:11:00	5	4	8	5	6	100	29	88
69	1594118	02/10/2019 17:12:00	7	5	12	7	8	100	30	83
69	1594118	02/10/2019 17:13:00	21	10	31	21	24	97	36	53
69	1594118	02/10/2019 17:14:00	29	25	31	29	35	98	32	27
69	1594118	02/10/2019 17:15:00	29	23	37	29	34	94	29	41
69	1594118	02/10/2019 17:16:00	10	4	23	10	12	37	30	76
69	1594118	02/10/2019 17:17:00	3	2	5	3	4	87	27	92
69	1594118	02/10/2019 17:18:00	4	3	6	4	5	100	28	89
69	1594118	02/10/2019 17:19:00	15	6	21	15	18	98	27	65
69	1594118	02/10/2019 17:20:00	26	19	30	25	31	89	45	37
69	1594118	02/10/2019 17:21:00	29	27	37	29	36	14	62	6
71	862927	02/20/2019 00:26:00	39	36	42	39	44	19	45	7
71	862927	02/20/2019 00:27:00	47	38	51	49	58	60	28	8
71	862927	02/20/2019 00:28:00	48	45	51	49	60	98	28	16
71	862927	02/20/2019 00:29:00	47	43	51	47	48	100	27	14
71	862927	02/20/2019 00:30:00	39	35	45	39	42	100	27	29
71	862927	02/20/2019 00:31:00	34	31	37	34	37	100	27	35
71	862927	02/20/2019 00:32:00	38	35	42	38	41	100	27	30
71	862927	02/20/2019 00:33:00	38	34	43	38	42	100	28	31
71	862927	02/20/2019 00:34:00	47	41	52	48	56	99	31	16
71	862927	02/20/2019 00:35:00	51	50	51	51	62	97	30	9
71	862927	02/20/2019 00:36:00	49	42	52	50	64	84	28	10
71	862927	02/20/2019 00:37:00	48	42	52	50	52	100	28	9
71	862927	02/20/2019 00:38:00	51	46	54	53	57	95	28	4
71	862927	02/20/2019 00:39:00	48	45	54	52	54	70	28	5
71	862927	02/20/2019 00:40:00	47	43	51	51	53	66	28	3
71	862927	02/20/2019 00:41:00	45	44	47	45	45	68	29	2
71	862927	02/20/2019 00:42:00	45	41	54	45	51	69	30	2
71	862927	02/20/2019 00:43:00	48	41	51	49	53	72	29	1
71	862927	02/20/2019 00:44:00	51	45	52	51	52	52	29	2
71	862927	02/20/2019 00:45:00	51	51	52	53	63	70	28	2
71	862927	02/20/2019 00:46:00	52	51	54	53	65	67	28	1
71	862927	02/20/2019 00:47:00	50	44	54	49	52	92	29	2
71	862927	02/20/2019 00:48:00	50	45	53	49	52	75	29	0
71	862927	02/20/2019 00:49:00	51	49	52	52	58	75	28	0
71	862927	02/20/2019 00:50:00	50	46	51	50	53	94	29	1
71	862927	02/20/2019 00:51:00	47	45	50	46	47	97	29	1
71	862927	02/20/2019 00:52:00	50	49	52	51	55	91	28	0
71	862927	02/20/2019 00:53:00	48	46	52	48	52	46	29	0
71	862927	02/20/2019 00:54:00	49	43	52	50	51	45	28	0
71	862927	02/20/2019 00:55:00	47	42	52	47	48	69	29	1
71	862927	02/20/2019 00:56:00	51	51	52	52	59	75	31	2
71	862927	02/20/2019 00:57:00	47	44	52	47	50	61	28	1
71	862927	02/20/2019 00:58:00	42	42	42	42	42	9	29	0
71	862927	02/20/2019 00:59:00	46	44	50	46	58	11	29	3
71	862927	02/20/2019 01:00:00	51	46	53	51	63	65	30	1
71	862927	02/20/2019 01:01:00	48	45	52	48	50	61	29	0
71	862927	02/20/2019 01:02:00	50	46	51	50	52	84	30	1
71	862927	02/20/2019 01:03:00	51	49	52	53	62	57	29	3
71	862927	02/20/2019 01:04:00	48	42	58	51	59	86	32	1
71	862927	02/20/2019 01:05:00	53	49	56	54	59	83	35	0
71	862927	02/20/2019 01:06:00	52	51	52	54	61	75	35	0
71	862927	02/20/2019 01:07:00	52	51	53	55	66	89	34	1
71	862927	02/20/2019 01:08:00	51	49	52	52	66	91	35	0
71	862927	02/20/2019 01:09:00	51	49	53	53	68	84	30	0
71	862927	02/20/2019 01:10:00	51	50	52	52	64	94	32	1
71	862927	02/20/2019 01:11:00	51	48	52	51	53	96	31	3
71	862927	02/20/2019 01:12:00	49	45	52	51	54	97	31	2
71	862927	02/20/2019 01:13:00	43	41	49	46	51	100	31	8
71	862927	02/20/2019 01:14:00	42	41	47	45	63	100	31	12
71	862927	02/20/2019 01:15:00	46	41	52	54	56	100	32	8
71	862927	02/20/2019 01:16:00	50	45	54	57	60	90	33	4
71	862927	02/20/2019 01:17:00	51	47	54	64	65	86	32	2
71	862927	02/20/2019 01:18:00	48	45	52	58	58	96	32	5
71	862927	02/20/2019 01:19:00	52	44	59	57	59	98	32	7
71	862927	02/20/2019 01:20:00	50	45	54	53	55	100	31	10
71	862927	02/20/2019 01:21:00	48	43	54	53	58	100	32	9
71	862927	02/20/2019 01:22:00	49	45	52	52	56	100	31	6
71	862927	02/20/2019 01:23:00	47	43	50	50	55	100	31	6
71	862927	02/20/2019 01:24:00	48	42	54	49	54	99	31	6
71	862927	02/20/2019 01:25:00	46	41	53	47	49	98	32	4
71	862927	02/20/2019 01:26:00	51	48	54	53	61	94	33	5
71	862927	02/20/2019 01:27:00	45	40	51	45	47	89	33	3
71	862927	02/20/2019 01:28:00	48	42	53	48	49	100	32	4
71	862927	02/20/2019 01:29:00	52	47	54	52	57	98	33	2
71	862927	02/20/2019 01:30:00	54	45	73	54	57	87	33	2
71	862927	02/20/2019 01:31:00	54	50	63	59	64	97	37	1
71	862927	02/20/2019 01:32:00	52	49	55	62	70	96	40	0
71	862927	02/20/2019 01:33:00	57	48	64	60	68	99	38	0
71	862927	02/20/2019 01:34:00	59	56	63	65	79	97	39	0
71	862927	02/20/2019 01:35:00	53	50	60	65	77	99	38	0
71	862927	02/20/2019 01:36:00	52	47	58	61	70	94	37	1
71	862927	02/20/2019 01:37:00	53	51	57	57	62	85	34	0
71	862927	02/20/2019 01:38:00	56	53	58	61	66	97	34	2
71	862927	02/20/2019 01:39:00	49	42	57	59	65	100	34	3
71	862927	02/20/2019 01:40:00	50	45	54	58	64	100	34	3
71	862927	02/20/2019 01:41:00	43	41	48	57	64	97	34	2
71	862927	02/20/2019 01:42:00	49	44	57	58	63	96	34	1
71	862927	02/20/2019 01:43:00	49	45	52	53	59	99	34	0
71	862927	02/20/2019 01:44:00	52	41	68	52	53	91	35	0
71	862927	02/20/2019 01:45:00	60	58	64	64	73	97	36	1
71	862927	02/20/2019 01:46:00	58	57	60	62	69	98	36	0
71	862927	02/20/2019 01:47:00	58	56	60	60	64	84	34	0
71	862927	02/20/2019 01:48:00	59	55	64	61	64	100	34	1
71	862927	02/20/2019 01:49:00	59	57	62	62	65	100	34	1
71	862927	02/20/2019 01:50:00	57	50	61	59	61	100	34	1
72	1595332	02/21/2019 12:52:00	43	38	47	41	41	30	31	0
72	1595332	02/21/2019 12:53:00	41	38	45	39	38	80	29	0
72	1595332	02/21/2019 12:54:00	48	38	63	45	46	78	31	0
72	1595332	02/21/2019 12:55:00	37	29	41	34	34	66	31	0
72	1595332	02/21/2019 12:56:00	34	29	40	32	35	61	27	0
72	1595332	02/21/2019 12:57:00	38	33	47	36	40	73	30	0
72	1595332	02/21/2019 12:58:00	34	28	46	34	39	85	26	1
72	1595332	02/21/2019 12:59:00	33	26	43	33	40	86	25	0
72	1595332	02/21/2019 13:00:00	36	31	40	36	41	91	26	0
72	1595332	02/21/2019 13:01:00	32	28	37	32	41	87	27	1
72	1595332	02/21/2019 13:02:00	37	30	44	36	43	79	27	0
72	1595332	02/21/2019 13:03:00	47	40	49	46	49	81	28	0
72	1595332	02/21/2019 13:04:00	31	28	40	31	40	56	30	0
72	1595332	02/21/2019 13:05:00	37	30	43	37	41	46	30	0
72	1595332	02/21/2019 13:06:00	38	31	46	37	38	63	27	0
72	1595332	02/21/2019 13:07:00	39	31	46	37	39	61	27	1
72	1595332	02/21/2019 13:08:00	40	38	45	39	42	64	26	0
72	1595332	02/21/2019 13:09:00	30	28	39	30	38	53	26	1
72	1595332	02/21/2019 13:10:00	32	27	36	32	37	49	28	0
72	1595332	02/21/2019 13:11:00	37	32	41	36	38	44	26	0
72	1595332	02/21/2019 13:12:00	40	35	47	38	41	68	27	0
72	1595332	02/21/2019 13:13:00	48	45	51	46	43	74	27	0
72	1595332	02/21/2019 13:14:00	38	34	49	37	38	67	27	0
72	1595332	02/21/2019 13:15:00	40	36	46	39	42	68	26	0
72	1595332	02/21/2019 13:16:00	48	45	51	47	44	27	26	0
72	1595332	02/21/2019 13:17:00	53	53	53	51	52	2	27	0
72	1595332	02/21/2019 13:18:00	48	45	52	45	44	39	27	0
72	1595332	02/21/2019 13:19:00	41	31	46	40	42	22	29	0
72	1595332	02/21/2019 13:20:00	38	34	42	37	42	60	30	0
72	1595332	02/21/2019 13:21:00	40	35	46	39	40	40	28	0
72	1595332	02/21/2019 13:22:00	36	31	47	35	41	35	32	0
72	1595332	02/21/2019 13:23:00	36	28	47	36	43	56	37	0
72	1595332	02/21/2019 13:24:00	40	35	46	39	43	69	38	1
72	1595332	02/21/2019 13:25:00	43	38	51	41	44	71	34	1
72	1595332	02/21/2019 13:26:00	37	34	41	36	40	71	34	1
72	1595332	02/21/2019 13:27:00	36	31	41	35	38	67	29	0
72	1595332	02/21/2019 13:28:00	36	31	41	34	37	87	26	0
72	1595332	02/21/2019 13:29:00	42	37	47	39	41	93	28	0
72	1595332	02/21/2019 13:30:00	42	37	51	41	45	92	27	0
72	1595332	02/21/2019 13:31:00	43	39	47	41	43	98	26	0
72	1595332	02/21/2019 13:32:00	41	37	45	40	42	93	27	1
72	1595332	02/21/2019 13:33:00	41	33	51	40	44	76	30	0
72	1595332	02/21/2019 13:34:00	45	40	50	43	43	88	31	0
72	1595332	02/21/2019 13:35:00	43	40	47	41	43	86	29	1
72	1595332	02/21/2019 13:36:00	42	36	46	41	43	91	28	0
72	1595332	02/21/2019 13:37:00	40	35	44	38	41	85	28	0
72	1595332	02/21/2019 13:38:00	41	34	47	39	41	87	28	1
72	1595332	02/21/2019 13:39:00	47	43	50	45	47	94	28	1
72	1595332	02/21/2019 13:40:00	42	38	49	40	43	96	27	0
72	1595332	02/21/2019 13:41:00	44	41	49	42	42	89	26	0
72	1595332	02/21/2019 13:42:00	41	36	45	39	42	87	28	0
72	1595332	02/21/2019 13:43:00	35	29	42	33	37	78	27	0
72	1595332	02/21/2019 13:44:00	33	27	38	31	32	90	28	0
72	1595332	02/21/2019 13:45:00	39	36	44	37	39	90	26	0
72	1595332	02/21/2019 13:46:00	39	36	44	37	39	94	26	1
72	1595332	02/21/2019 13:47:00	41	38	45	39	41	87	26	1
72	1595332	02/21/2019 13:48:00	42	38	45	40	41	90	26	0
72	1595332	02/21/2019 13:49:00	44	42	47	41	42	79	26	1
72	1595332	02/21/2019 13:50:00	45	42	49	43	41	97	26	3
72	1595332	02/21/2019 13:51:00	44	41	47	42	42	100	26	1
72	1595332	02/21/2019 13:52:00	44	40	48	42	42	93	26	0
72	1595332	02/21/2019 13:53:00	41	36	47	39	41	77	26	2
72	1595332	02/21/2019 13:54:00	43	34	49	41	41	70	26	2
72	1595332	02/21/2019 13:55:00	42	39	47	40	40	81	26	2
72	1595332	02/21/2019 13:56:00	45	40	52	43	44	95	26	1
72	1595332	02/21/2019 13:57:00	39	35	43	37	40	83	29	1
72	1595332	02/21/2019 13:58:00	39	34	44	38	41	87	27	0
72	1595332	02/21/2019 13:59:00	45	39	49	43	43	88	26	0
72	1595332	02/21/2019 14:00:00	42	39	45	39	38	87	26	0
72	1595332	02/21/2019 14:01:00	43	41	45	41	39	54	28	0
72	1595332	02/21/2019 14:02:00	44	39	47	41	41	54	28	2
72	1595332	02/21/2019 14:03:00	42	38	45	40	41	60	29	0
72	1595332	02/21/2019 14:04:00	42	37	47	40	40	71	28	1
72	1595332	02/21/2019 14:05:00	46	40	54	43	40	86	28	0
72	1595332	02/21/2019 14:06:00	45	39	54	43	46	80	27	0
72	1595332	02/21/2019 14:07:00	51	39	78	49	51	63	27	0
72	1595332	02/21/2019 14:08:00	47	37	76	45	45	80	27	0
72	1595332	02/21/2019 14:09:00	45	42	48	42	42	88	26	0
72	1595332	02/21/2019 14:10:00	47	40	53	45	45	91	30	1
72	1595332	02/21/2019 14:11:00	45	39	51	43	43	91	29	0
72	1595332	02/21/2019 14:12:00	48	36	55	46	45	91	28	0
72	1595332	02/21/2019 14:13:00	43	39	48	41	38	82	28	1
72	1595332	02/21/2019 14:14:00	42	37	50	40	39	94	28	0
72	1595332	02/21/2019 14:15:00	45	39	54	43	41	91	27	1
72	1595332	02/21/2019 14:16:00	47	43	54	44	41	95	26	0
72	1595332	02/21/2019 14:17:00	44	42	47	42	39	98	27	0
72	1595332	02/21/2019 14:18:00	43	39	47	41	39	97	26	0
72	1595332	02/21/2019 14:19:00	44	40	52	42	40	97	26	0
72	1595332	02/21/2019 14:20:00	48	43	52	45	43	91	26	0
72	1595332	02/21/2019 14:21:00	44	40	52	41	40	96	26	1
72	1595332	02/21/2019 14:22:00	47	44	52	44	43	98	26	1
72	1595332	02/21/2019 14:23:00	49	46	53	47	42	89	27	1
72	1595332	02/21/2019 14:24:00	46	41	53	43	41	80	26	0
72	1595332	02/21/2019 14:25:00	46	36	54	44	44	89	26	0
72	1595332	02/21/2019 14:26:00	45	41	51	42	41	96	26	1
72	1595332	02/21/2019 14:27:00	46	40	54	44	44	94	26	0
72	1595332	02/21/2019 14:28:00	44	38	54	42	40	92	26	0
72	1595332	02/21/2019 14:29:00	44	39	50	42	40	100	26	1
72	1595332	02/21/2019 14:30:00	48	43	52	46	44	98	26	0
72	1595332	02/21/2019 14:31:00	44	33	54	42	41	90	26	0
72	1595332	02/21/2019 14:32:00	36	32	43	35	37	96	25	0
72	1595332	02/21/2019 14:33:00	44	39	48	42	40	88	28	0
72	1595332	02/21/2019 14:34:00	45	41	51	43	41	79	28	0
72	1595332	02/21/2019 14:35:00	48	44	57	46	41	84	29	0
72	1595332	02/21/2019 14:36:00	44	38	52	42	41	71	27	0
72	1595332	02/21/2019 14:37:00	45	42	48	43	40	75	48	1
72	1595332	02/21/2019 14:38:00	46	46	47	44	40	3	52	0
72	1595332	02/21/2019 14:39:00	255	255	255	255	255	0	57	255
74	1596615	03/05/2019 03:42:00	53	46	66	51	59	69	25	7
74	1596615	03/05/2019 03:43:00	54	50	61	54	64	100	26	11
74	1596615	03/05/2019 03:44:00	54	49	56	54	57	94	28	6
74	1596615	03/05/2019 03:45:00	50	45	57	50	58	80	31	3
74	1596615	03/05/2019 03:46:00	49	40	60	48	53	78	28	6
74	1596615	03/05/2019 03:47:00	59	47	66	58	69	85	29	7
74	1596615	03/05/2019 03:48:00	50	47	54	50	63	87	28	8
74	1596615	03/05/2019 03:49:00	55	50	61	55	64	97	25	10
74	1596615	03/05/2019 03:50:00	42	38	51	42	43	100	25	19
74	1596615	03/05/2019 03:51:00	37	35	39	37	39	96	27	22
74	1596615	03/05/2019 03:52:00	38	36	39	38	39	87	26	17
74	1596615	03/05/2019 03:53:00	36	35	38	36	38	100	25	24
74	1596615	03/05/2019 03:54:00	38	37	40	38	39	100	28	17
74	1596615	03/05/2019 03:55:00	47	40	54	47	48	100	26	15
74	1596615	03/05/2019 03:56:00	44	38	50	44	45	100	27	17
74	1596615	03/05/2019 03:57:00	39	38	40	39	40	100	26	16
74	1596615	03/05/2019 03:58:00	40	38	42	40	42	97	26	21
74	1596615	03/05/2019 03:59:00	41	40	42	41	42	99	26	16
74	1596615	03/05/2019 04:00:00	44	42	46	44	44	77	28	10
74	1596615	03/05/2019 04:01:00	42	39	45	42	44	93	28	18
74	1596615	03/05/2019 04:02:00	39	38	40	39	40	84	25	15
74	1596615	03/05/2019 04:03:00	38	38	39	38	39	96	25	16
74	1596615	03/05/2019 04:04:00	38	37	40	38	40	82	26	19
74	1596615	03/05/2019 04:05:00	38	35	41	38	40	93	26	21
74	1596615	03/05/2019 04:06:00	36	26	41	36	39	43	26	19
74	1596615	03/05/2019 04:07:00	33	31	36	33	37	70	25	29
74	1596615	03/05/2019 04:08:00	37	31	40	37	39	48	26	17
74	1596615	03/05/2019 04:09:00	48	40	59	48	49	27	26	15
74	1596615	03/05/2019 04:10:00	30	28	37	30	36	9	28	29
74	1596615	03/05/2019 04:11:00	21	13	30	21	25	48	25	49
74	1596615	03/05/2019 04:12:00	33	12	54	33	36	45	27	36
74	1596615	03/05/2019 04:13:00	39	34	47	39	43	16	26	12
74	1596615	03/05/2019 04:14:00	36	31	38	36	43	17	27	10
74	1596615	03/05/2019 04:15:00	46	31	62	46	51	45	27	18
74	1596615	03/05/2019 04:16:00	30	27	35	30	37	43	26	18
74	1596615	03/05/2019 04:17:00	29	26	31	29	34	23	26	28
74	1596615	03/05/2019 04:18:00	32	27	36	32	35	52	26	32
74	1596615	03/05/2019 04:19:00	35	28	41	35	38	73	25	32
74	1596615	03/05/2019 04:20:00	21	13	30	21	25	62	27	51
74	1596615	03/05/2019 04:21:00	26	16	31	26	30	83	27	43
74	1596615	03/05/2019 04:22:00	12	3	16	12	14	51	31	72
74	1596615	03/05/2019 04:23:00	63	35	72	63	65	25	28	16
74	1596615	03/05/2019 04:24:00	44	16	60	44	48	48	28	32
74	1596615	03/05/2019 04:25:00	27	21	31	27	32	67	27	40
74	1596615	03/05/2019 04:26:00	22	18	25	22	26	65	28	49
74	1596615	03/05/2019 04:27:00	34	24	40	34	36	74	36	30
74	1596615	03/05/2019 04:28:00	31	27	39	31	34	87	37	39
74	1596615	03/05/2019 04:29:00	38	26	43	38	40	65	28	24
74	1596615	03/05/2019 04:30:00	15	9	25	15	18	86	27	64
74	1596615	03/05/2019 04:31:00	29	19	35	29	32	91	34	39
74	1596615	03/05/2019 04:32:00	29	21	37	29	32	83	35	39
74	1596615	03/05/2019 04:33:00	39	37	41	39	40	82	39	13
74	1596615	03/05/2019 04:34:00	41	35	45	41	44	75	34	19
74	1596615	03/05/2019 04:35:00	46	45	47	46	46	76	33	10
74	1596615	03/05/2019 04:36:00	41	29	47	41	42	90	31	20
74	1596615	03/05/2019 04:37:00	18	9	29	18	21	49	31	60
74	1596615	03/05/2019 04:38:00	32	15	39	32	35	73	31	32
74	1596615	03/05/2019 04:39:00	38	37	39	38	38	85	27	7
74	1596615	03/05/2019 04:40:00	41	37	46	41	41	90	33	13
74	1596615	03/05/2019 04:41:00	47	46	48	47	47	82	37	7
74	1596615	03/05/2019 04:42:00	45	30	49	45	46	76	30	18
74	1596615	03/05/2019 04:43:00	33	29	37	33	36	83	28	32
74	1596615	03/05/2019 04:44:00	37	37	37	37	37	82	30	11
74	1596615	03/05/2019 04:45:00	23	14	37	23	26	71	31	48
74	1596615	03/05/2019 04:46:00	36	15	51	36	39	53	31	32
74	1596615	03/05/2019 04:47:00	40	36	48	40	42	75	28	21
74	1596615	03/05/2019 04:48:00	37	35	39	37	39	69	29	23
74	1596615	03/05/2019 04:49:00	33	28	37	33	37	87	28	29
74	1596615	03/05/2019 04:50:00	28	23	35	28	34	62	31	31
74	1596615	03/05/2019 04:51:00	32	28	38	32	38	90	29	15
74	1596615	03/05/2019 04:52:00	40	38	40	40	40	83	28	14
74	1596615	03/05/2019 04:53:00	40	40	40	40	40	49	34	7
74	1596615	03/05/2019 04:54:00	36	28	41	36	39	77	34	18
74	1596615	03/05/2019 04:55:00	40	28	44	40	42	71	29	9
74	1596615	03/05/2019 04:56:00	35	28	42	35	39	85	28	13
74	1596615	03/05/2019 04:57:00	31	28	37	31	35	92	25	31
74	1596615	03/05/2019 04:58:00	37	36	37	37	38	97	25	17
74	1596615	03/05/2019 04:59:00	36	34	37	36	38	100	25	23
74	1596615	03/05/2019 05:00:00	35	34	36	35	37	100	25	21
74	1596615	03/05/2019 05:01:00	29	25	34	29	33	75	28	35
74	1596615	03/05/2019 05:02:00	31	25	34	31	35	33	26	22
74	1596615	03/05/2019 05:03:00	36	34	42	36	42	17	27	16
74	1596615	03/05/2019 05:04:00	36	30	54	36	44	73	25	17
74	1596615	03/05/2019 05:05:00	37	32	38	37	37	87	25	9
74	1596615	03/05/2019 05:06:00	39	38	40	39	39	99	26	13
74	1596615	03/05/2019 05:07:00	39	39	40	39	40	99	28	11
74	1596615	03/05/2019 05:08:00	38	38	40	38	40	80	29	17
74	1596615	03/05/2019 05:09:00	40	40	40	40	40	78	29	9
74	1596615	03/05/2019 05:10:00	44	40	47	44	45	58	25	13
74	1596615	03/05/2019 05:11:00	43	41	46	43	45	63	26	14
74	1596615	03/05/2019 05:12:00	39	38	41	39	40	93	25	13
74	1596615	03/05/2019 05:13:00	38	37	38	38	38	88	27	12
74	1596615	03/05/2019 05:14:00	38	37	39	38	38	63	26	4
74	1596615	03/05/2019 05:15:00	39	39	40	39	40	85	25	10
74	1596615	03/05/2019 05:16:00	38	38	39	38	39	85	26	8
74	1596615	03/05/2019 05:17:00	39	38	42	39	39	68	27	5
74	1596615	03/05/2019 05:18:00	44	42	49	44	47	85	30	8
74	1596615	03/05/2019 05:19:00	42	38	48	42	43	88	26	14
74	1596615	03/05/2019 05:20:00	37	36	38	37	38	97	27	16
74	1596615	03/05/2019 05:21:00	37	37	38	37	38	82	26	12
74	1596615	03/05/2019 05:22:00	35	30	38	35	38	39	26	20
74	1596615	03/05/2019 05:23:00	37	36	39	37	37	49	29	8
74	1596615	03/05/2019 05:24:00	46	39	55	46	46	52	28	2
74	1596615	03/05/2019 05:25:00	52	42	55	52	62	68	30	12
74	1596615	03/05/2019 05:26:00	48	33	55	48	57	62	28	12
74	1596615	03/05/2019 05:27:00	45	35	52	45	47	83	32	12
74	1596615	03/05/2019 05:28:00	25	18	37	25	29	56	33	43
74	1596615	03/05/2019 05:29:00	28	26	36	28	35	65	27	15
74	1596615	03/05/2019 05:30:00	35	35	37	35	35	92	27	8
74	1596615	03/05/2019 05:31:00	37	36	38	37	38	66	25	16
74	1596615	03/05/2019 05:32:00	39	38	39	39	39	23	26	11
74	1596615	03/05/2019 05:33:00	45	32	55	45	52	65	30	14
74	1596615	03/05/2019 05:34:00	44	42	47	44	44	69	29	9
74	1596615	03/05/2019 05:35:00	46	45	47	46	46	53	28	5
74	1596615	03/05/2019 05:36:00	43	35	49	43	45	78	28	21
74	1596615	03/05/2019 05:37:00	37	34	40	37	39	94	27	24
74	1596615	03/05/2019 05:38:00	37	35	39	37	37	94	26	12
74	1596615	03/05/2019 05:39:00	37	36	38	37	37	95	26	11
74	1596615	03/05/2019 05:40:00	31	27	37	31	38	98	25	19
74	1596615	03/05/2019 05:41:00	26	25	27	26	35	91	25	17
74	1596615	03/05/2019 05:42:00	35	25	36	35	35	86	28	7
74	1596615	03/05/2019 05:43:00	38	37	39	38	38	60	27	9
74	1596615	03/05/2019 05:44:00	44	39	53	44	58	16	26	7
74	1596615	03/05/2019 05:45:00	50	41	58	50	62	78	26	10
74	1596615	03/05/2019 05:46:00	40	38	41	40	40	93	26	14
74	1596615	03/05/2019 05:47:00	39	38	39	39	39	90	27	7
74	1596615	03/05/2019 05:48:00	41	39	42	41	41	93	27	11
74	1596615	03/05/2019 05:49:00	37	30	42	37	40	98	25	12
74	1596615	03/05/2019 05:50:00	39	38	39	39	39	95	25	11
74	1596615	03/05/2019 05:51:00	38	38	39	38	39	99	27	13
74	1596615	03/05/2019 05:52:00	37	33	38	37	38	94	29	13
74	1596615	03/05/2019 05:53:00	36	34	38	36	38	90	25	9
74	1596615	03/05/2019 05:54:00	38	38	39	38	38	89	27	11
74	1596615	03/05/2019 05:55:00	40	39	43	40	40	80	25	5
74	1596615	03/05/2019 05:56:00	42	40	44	42	42	91	26	7
74	1596615	03/05/2019 05:57:00	36	27	40	36	39	87	25	7
74	1596615	03/05/2019 05:58:00	37	31	38	37	38	87	26	9
74	1596615	03/05/2019 05:59:00	33	29	37	33	37	60	25	29
74	1596615	03/05/2019 06:00:00	36	34	38	36	43	38	31	16
74	1596615	03/05/2019 06:01:00	35	31	43	35	43	40	29	10
74	1596615	03/05/2019 06:02:00	35	32	38	35	40	54	26	7
74	1596615	03/05/2019 06:03:00	30	26	39	30	36	24	27	11
74	1596615	03/05/2019 06:04:00	30	29	33	30	33	57	31	6
74	1596615	03/05/2019 06:05:00	28	24	36	28	36	53	27	12
74	1596615	03/05/2019 06:06:00	27	25	31	27	36	65	27	10
74	1596615	03/05/2019 06:07:00	27	25	29	27	36	57	28	7
74	1596615	03/05/2019 06:08:00	28	25	37	28	35	66	29	3
74	1596615	03/05/2019 06:09:00	38	33	41	38	40	81	26	8
74	1596615	03/05/2019 06:10:00	37	29	40	37	38	92	28	9
74	1596615	03/05/2019 06:11:00	32	26	37	32	37	80	25	10
74	1596615	03/05/2019 06:12:00	31	28	34	31	36	84	27	19
74	1596615	03/05/2019 06:13:00	35	29	38	35	35	71	26	3
74	1596615	03/05/2019 06:14:00	38	38	39	38	38	95	26	10
74	1596615	03/05/2019 06:15:00	36	29	38	36	38	76	29	17
74	1596615	03/05/2019 06:16:00	27	25	29	27	36	80	27	10
74	1596615	03/05/2019 06:17:00	34	27	39	34	38	75	30	8
74	1596615	03/05/2019 06:18:00	40	37	46	40	41	26	26	5
74	1596615	03/05/2019 06:19:00	40	24	48	40	45	73	25	12
74	1596615	03/05/2019 06:20:00	25	24	30	25	34	89	26	9
74	1596615	03/05/2019 06:21:00	34	24	37	34	35	90	25	6
74	1596615	03/05/2019 06:22:00	38	37	39	38	38	93	26	6
74	1596615	03/05/2019 06:23:00	39	38	39	39	39	84	25	11
74	1596615	03/05/2019 06:24:00	38	36	39	38	39	95	27	15
74	1596615	03/05/2019 06:25:00	34	34	36	34	34	61	28	7
74	1596615	03/05/2019 06:26:00	36	34	38	36	36	65	25	7
74	1596615	03/05/2019 06:27:00	37	32	38	37	38	69	26	9
74	1596615	03/05/2019 06:28:00	39	37	43	39	41	73	25	4
74	1596615	03/05/2019 06:29:00	42	35	49	42	49	42	25	9
74	1596615	03/05/2019 06:30:00	42	38	46	42	47	35	25	5
74	1596615	03/05/2019 06:31:00	42	38	51	42	50	24	25	10
74	1596615	03/05/2019 06:32:00	51	47	60	51	59	51	27	8
74	1596615	03/05/2019 06:33:00	42	38	45	42	48	62	27	3
74	1596615	03/05/2019 06:34:00	40	35	42	40	49	67	27	3
74	1596615	03/05/2019 06:35:00	41	40	42	41	61	68	29	4
74	1596615	03/05/2019 06:36:00	43	41	47	43	64	69	26	4
74	1596615	03/05/2019 06:37:00	46	44	49	46	58	83	26	6
74	1596615	03/05/2019 06:38:00	46	43	49	46	47	85	26	7
74	1596615	03/05/2019 06:39:00	39	38	43	39	39	85	26	6
74	1596615	03/05/2019 06:40:00	37	36	38	37	37	97	26	7
74	1596615	03/05/2019 06:41:00	39	37	42	39	39	92	26	6
74	1596615	03/05/2019 06:42:00	38	28	43	38	45	87	28	6
74	1596615	03/05/2019 06:43:00	34	28	40	34	41	84	26	7
74	1596615	03/05/2019 06:44:00	40	40	41	40	40	85	26	4
74	1596615	03/05/2019 06:45:00	43	41	45	43	52	70	29	6
74	1596615	03/05/2019 06:46:00	49	41	59	49	62	65	27	1
74	1596615	03/05/2019 06:47:00	52	46	58	52	67	72	25	4
74	1596615	03/05/2019 06:48:00	36	34	54	36	45	77	25	5
74	1596615	03/05/2019 06:49:00	34	33	39	34	39	87	25	5
74	1596615	03/05/2019 06:50:00	39	33	40	39	40	86	26	6
74	1596615	03/05/2019 06:51:00	39	39	40	39	39	80	25	5
74	1596615	03/05/2019 06:52:00	42	39	45	42	42	77	25	6
74	1596615	03/05/2019 06:53:00	42	41	45	42	43	83	25	4
74	1596615	03/05/2019 06:54:00	43	41	48	43	51	86	26	4
74	1596615	03/05/2019 06:55:00	44	34	52	44	53	77	27	7
74	1596615	03/05/2019 06:56:00	40	37	43	40	40	82	25	5
74	1596615	03/05/2019 06:57:00	45	39	51	45	48	75	25	0
74	1596615	03/05/2019 06:58:00	46	38	56	45	52	65	27	2
74	1596615	03/05/2019 06:59:00	50	46	54	50	53	76	26	4
74	1596615	03/05/2019 07:00:00	55	51	57	54	56	81	26	3
74	1596615	03/05/2019 07:01:00	49	48	54	49	60	63	26	1
74	1596615	03/05/2019 07:02:00	56	45	68	56	64	62	27	2
74	1596615	03/05/2019 07:03:00	53	45	62	53	61	71	25	1
74	1596615	03/05/2019 07:04:00	51	45	54	51	60	65	48	2
74	1596615	03/05/2019 07:05:00	52	50	54	52	56	9	25	0
74	1596615	03/05/2019 07:06:00	255	255	255	255	255	0	25	255
80	1564852	04/09/2019 23:46:00	42	39	45	41	47	45	26	4
80	1564852	04/09/2019 23:47:00	42	38	46	42	50	94	25	2
80	1564852	04/09/2019 23:48:00	40	37	46	40	49	90	25	1
80	1564852	04/09/2019 23:49:00	39	33	50	39	48	97	25	2
80	1564852	04/09/2019 23:50:00	38	34	49	37	42	96	25	1
80	1564852	04/09/2019 23:51:00	38	33	42	37	39	99	25	3
80	1564852	04/09/2019 23:52:00	36	30	49	36	43	95	25	0
80	1564852	04/09/2019 23:53:00	46	37	54	44	47	96	25	4
80	1564852	04/09/2019 23:54:00	41	36	48	40	46	98	25	2
80	1564852	04/09/2019 23:55:00	40	37	46	40	48	94	25	1
80	1564852	04/09/2019 23:56:00	45	41	48	44	46	83	26	2
80	1564852	04/09/2019 23:57:00	45	39	49	43	45	90	25	2
80	1564852	04/09/2019 23:58:00	38	30	49	38	47	98	25	5
80	1564852	04/09/2019 23:59:00	40	34	46	39	48	94	24	2
80	1564852	04/10/2019 00:00:00	42	38	46	42	52	90	25	3
80	1564852	04/10/2019 00:01:00	41	39	45	41	50	93	25	2
80	1564852	04/10/2019 00:02:00	42	35	48	41	49	87	25	1
80	1564852	04/10/2019 00:03:00	43	37	46	42	50	51	25	3
80	1564852	04/10/2019 00:04:00	45	40	54	44	46	59	25	2
80	1564852	04/10/2019 00:05:00	48	38	53	47	50	61	25	2
80	1564852	04/10/2019 00:06:00	43	36	47	42	46	61	28	0
80	1564852	04/10/2019 00:07:00	40	35	43	39	46	61	25	0
80	1564852	04/10/2019 00:08:00	44	37	49	44	50	84	25	0
80	1564852	04/10/2019 00:09:00	45	42	49	43	45	38	24	0
80	1564852	04/10/2019 00:10:00	255	255	255	255	255	0	24	255
80	1564852	04/10/2019 00:11:00	49	45	53	47	47	13	25	0
80	1564852	04/10/2019 00:12:00	47	42	50	44	44	51	24	0
80	1564852	04/10/2019 00:13:00	46	41	49	44	46	54	26	0
80	1564852	04/10/2019 00:14:00	47	44	50	45	47	56	26	2
80	1564852	04/10/2019 00:15:00	46	38	53	45	50	51	26	6
80	1564852	04/10/2019 00:16:00	39	38	43	39	46	77	31	2
80	1564852	04/10/2019 00:17:00	43	39	50	42	43	71	28	1
80	1564852	04/10/2019 00:18:00	47	41	51	46	49	68	29	0
80	1564852	04/10/2019 00:19:00	50	41	53	49	58	80	29	0
80	1564852	04/10/2019 00:20:00	47	43	52	45	47	81	26	2
80	1564852	04/10/2019 00:21:00	42	38	46	42	48	93	25	2
80	1564852	04/10/2019 00:22:00	42	38	47	41	48	97	26	4
80	1564852	04/10/2019 00:23:00	41	36	44	41	52	98	25	2
80	1564852	04/10/2019 00:24:00	38	34	42	37	46	98	25	3
80	1564852	04/10/2019 00:25:00	38	37	40	38	49	100	25	2
80	1564852	04/10/2019 00:26:00	40	37	45	40	48	90	26	1
80	1564852	04/10/2019 00:27:00	40	35	42	40	50	87	25	0
80	1564852	04/10/2019 00:28:00	42	39	50	42	48	94	25	1
80	1564852	04/10/2019 00:29:00	42	35	51	42	51	96	25	5
80	1564852	04/10/2019 00:30:00	42	39	45	41	49	95	25	4
80	1564852	04/10/2019 00:31:00	45	41	48	45	52	91	25	2
80	1564852	04/10/2019 00:32:00	43	35	46	43	53	88	26	2
80	1564852	04/10/2019 00:33:00	37	32	42	37	46	94	26	2
80	1564852	04/10/2019 00:34:00	37	32	44	37	46	83	25	2
80	1564852	04/10/2019 00:35:00	41	37	44	40	48	97	25	2
80	1564852	04/10/2019 00:36:00	35	32	42	35	44	89	26	0
80	1564852	04/10/2019 00:37:00	38	31	49	38	47	67	27	0
80	1564852	04/10/2019 00:38:00	40	34	59	40	48	85	26	2
80	1564852	04/10/2019 00:39:00	43	32	62	43	51	95	26	1
80	1564852	04/10/2019 00:40:00	44	28	61	43	46	86	26	2
80	1564852	04/10/2019 00:41:00	38	28	46	38	47	82	26	2
80	1564852	04/10/2019 00:42:00	41	34	47	40	43	95	26	2
80	1564852	04/10/2019 00:43:00	42	35	48	41	48	92	26	0
80	1564852	04/10/2019 00:44:00	44	40	50	43	47	95	25	1
80	1564852	04/10/2019 00:45:00	47	41	52	45	45	100	25	2
80	1564852	04/10/2019 00:46:00	39	36	44	39	47	99	25	4
80	1564852	04/10/2019 00:47:00	40	37	43	40	50	84	26	4
80	1564852	04/10/2019 00:48:00	44	39	49	43	48	100	25	1
80	1564852	04/10/2019 00:49:00	45	40	48	43	45	98	25	3
80	1564852	04/10/2019 00:50:00	48	43	52	46	47	99	25	4
80	1564852	04/10/2019 00:51:00	40	37	46	40	46	100	25	2
80	1564852	04/10/2019 00:52:00	42	38	45	41	48	96	25	3
80	1564852	04/10/2019 00:53:00	42	37	47	42	47	93	26	2
80	1564852	04/10/2019 00:54:00	41	38	47	40	45	98	25	3
80	1564852	04/10/2019 00:55:00	42	36	46	41	46	99	25	1
80	1564852	04/10/2019 00:56:00	46	42	49	45	49	97	25	1
80	1564852	04/10/2019 00:57:00	47	42	52	46	46	80	25	0
80	1564852	04/10/2019 00:58:00	47	39	51	47	52	97	26	2
80	1564852	04/10/2019 00:59:00	39	33	44	38	45	98	25	1
80	1564852	04/10/2019 01:00:00	40	37	44	40	47	96	25	0
80	1564852	04/10/2019 01:01:00	43	38	48	42	45	98	28	1
80	1564852	04/10/2019 01:02:00	46	41	51	45	49	82	29	0
80	1564852	04/10/2019 01:03:00	55	47	68	53	54	85	35	0
80	1564852	04/10/2019 01:04:00	76	64	84	79	85	90	41	0
80	1564852	04/10/2019 01:05:00	75	64	85	78	81	95	40	0
80	1564852	04/10/2019 01:06:00	58	52	70	60	69	100	35	0
80	1564852	04/10/2019 01:07:00	67	58	73	69	86	86	45	0
80	1564852	04/10/2019 01:08:00	72	70	75	77	97	96	48	0
80	1564852	04/10/2019 01:09:00	77	74	82	81	94	100	44	0
80	1564852	04/10/2019 01:10:00	79	71	89	82	88	100	41	0
80	1564852	04/10/2019 01:11:00	73	68	78	75	79	100	37	0
80	1564852	04/10/2019 01:12:00	67	63	71	69	70	99	36	0
80	1564852	04/10/2019 01:13:00	70	62	78	71	72	98	37	0
80	1564852	04/10/2019 01:14:00	69	60	79	72	73	97	39	0
80	1564852	04/10/2019 01:15:00	65	57	81	66	67	97	34	0
80	1564852	04/10/2019 01:16:00	61	59	63	60	61	100	33	0
80	1564852	04/10/2019 01:17:00	57	51	64	55	55	89	31	0
80	1564852	04/10/2019 01:18:00	59	54	62	57	57	92	32	0
80	1564852	04/10/2019 01:19:00	60	57	66	60	63	100	31	0
80	1564852	04/10/2019 01:20:00	57	54	61	56	59	100	31	0
80	1564852	04/10/2019 01:21:00	56	52	59	56	59	100	31	0
80	1564852	04/10/2019 01:22:00	58	55	61	57	60	100	31	0
80	1564852	04/10/2019 01:23:00	55	50	58	53	55	100	31	0
80	1564852	04/10/2019 01:24:00	54	49	57	53	54	100	29	0
80	1564852	04/10/2019 01:25:00	60	56	68	59	60	100	29	0
80	1564852	04/10/2019 01:26:00	56	52	59	53	53	99	29	0
80	1564852	04/10/2019 01:27:00	56	51	60	54	54	88	29	0
80	1564852	04/10/2019 01:28:00	54	50	61	53	58	92	28	0
80	1564852	04/10/2019 01:29:00	48	47	51	48	56	100	29	0
80	1564852	04/10/2019 01:30:00	54	48	60	53	54	100	29	0
80	1564852	04/10/2019 01:31:00	54	51	57	52	55	72	44	0
82	786851	04/16/2019 00:45:00	55	52	58	55	62	24	36	0
82	786851	04/16/2019 00:46:00	54	47	62	53	56	59	39	0
82	786851	04/16/2019 00:47:00	52	49	63	54	62	73	34	0
82	786851	04/16/2019 00:48:00	51	46	62	51	61	93	34	0
82	786851	04/16/2019 00:49:00	52	46	62	52	62	88	33	0
82	786851	04/16/2019 00:50:00	50	45	66	50	59	92	32	0
82	786851	04/16/2019 00:51:00	49	41	56	48	51	98	31	0
82	786851	04/16/2019 00:52:00	45	42	50	44	45	96	31	0
82	786851	04/16/2019 00:53:00	44	37	48	44	48	92	31	1
82	786851	04/16/2019 00:54:00	44	40	47	44	48	92	30	0
82	786851	04/16/2019 00:55:00	41	28	46	41	47	84	29	0
82	786851	04/16/2019 00:56:00	34	30	39	34	41	85	29	1
82	786851	04/16/2019 00:57:00	34	27	41	34	41	89	28	1
82	786851	04/16/2019 00:58:00	33	29	37	32	39	92	28	2
82	786851	04/16/2019 00:59:00	28	23	33	28	36	99	27	4
82	786851	04/16/2019 01:00:00	28	23	33	28	37	100	27	9
82	786851	04/16/2019 01:01:00	27	24	32	27	36	100	26	6
82	786851	04/16/2019 01:02:00	26	20	32	26	34	99	26	7
82	786851	04/16/2019 01:03:00	22	18	26	21	29	65	27	7
82	786851	04/16/2019 01:04:00	25	20	29	24	32	73	28	11
82	786851	04/16/2019 01:05:00	25	18	30	25	34	87	27	7
82	786851	04/16/2019 01:06:00	32	29	36	32	39	86	31	7
82	786851	04/16/2019 01:07:00	32	29	36	32	38	95	30	6
82	786851	04/16/2019 01:08:00	30	26	34	30	38	97	32	7
82	786851	04/16/2019 01:09:00	29	21	38	29	36	92	28	3
82	786851	04/16/2019 01:10:00	31	26	35	30	34	98	26	3
82	786851	04/16/2019 01:11:00	31	25	37	30	34	100	26	6
82	786851	04/16/2019 01:12:00	30	23	35	29	35	100	26	9
82	786851	04/16/2019 01:13:00	32	28	35	31	37	100	27	9
82	786851	04/16/2019 01:14:00	33	27	38	32	37	100	26	9
82	786851	04/16/2019 01:15:00	36	32	39	34	37	96	27	6
82	786851	04/16/2019 01:16:00	31	27	34	31	37	87	26	8
82	786851	04/16/2019 01:17:00	35	30	38	35	38	100	27	5
82	786851	04/16/2019 01:18:00	40	36	43	38	38	98	27	3
82	786851	04/16/2019 01:19:00	32	28	39	32	37	100	26	6
82	786851	04/16/2019 01:20:00	22	18	26	22	31	100	26	10
82	786851	04/16/2019 01:21:00	26	20	30	25	33	100	26	11
82	786851	04/16/2019 01:22:00	31	25	34	30	34	100	26	10
82	786851	04/16/2019 01:23:00	31	28	35	30	34	100	26	8
82	786851	04/16/2019 01:24:00	32	28	36	32	39	100	27	7
82	786851	04/16/2019 01:25:00	32	29	36	32	38	97	27	4
82	786851	04/16/2019 01:26:00	28	23	32	28	36	83	27	4
82	786851	04/16/2019 01:27:00	34	23	42	34	39	97	28	4
82	786851	04/16/2019 01:28:00	35	30	40	35	38	98	28	4
82	786851	04/16/2019 01:29:00	32	27	37	32	38	98	27	4
82	786851	04/16/2019 01:30:00	32	30	35	32	38	100	27	3
82	786851	04/16/2019 01:31:00	32	27	36	32	38	100	27	3
82	786851	04/16/2019 01:32:00	33	27	38	32	37	97	27	0
82	786851	04/16/2019 01:33:00	28	25	32	27	33	97	26	2
82	786851	04/16/2019 01:34:00	30	24	36	29	33	97	25	2
82	786851	04/16/2019 01:35:00	26	22	30	25	30	96	26	4
82	786851	04/16/2019 01:36:00	25	19	30	25	30	83	26	5
82	786851	04/16/2019 01:37:00	28	25	31	26	29	96	25	4
82	786851	04/16/2019 01:38:00	25	18	31	24	30	93	26	1
82	786851	04/16/2019 01:39:00	23	20	27	23	32	97	25	2
82	786851	04/16/2019 01:40:00	27	23	30	26	32	97	25	4
82	786851	04/16/2019 01:41:00	27	21	31	25	29	98	25	2
82	786851	04/16/2019 01:42:00	31	27	36	29	29	99	26	0
82	786851	04/16/2019 01:43:00	33	28	37	31	30	93	27	2
82	786851	04/16/2019 01:44:00	27	22	30	26	30	96	26	2
82	786851	04/16/2019 01:45:00	23	18	26	22	29	97	27	3
82	786851	04/16/2019 01:46:00	27	23	32	26	28	85	26	5
82	786851	04/16/2019 01:47:00	26	23	34	26	32	97	26	3
82	786851	04/16/2019 01:48:00	27	21	32	26	28	100	26	4
82	786851	04/16/2019 01:49:00	29	24	33	28	31	100	25	7
82	786851	04/16/2019 01:50:00	30	26	34	29	32	97	25	4
82	786851	04/16/2019 01:51:00	25	19	32	24	30	93	26	8
82	786851	04/16/2019 01:52:00	24	21	27	23	28	98	26	4
82	786851	04/16/2019 01:53:00	29	23	34	27	27	97	26	4
82	786851	04/16/2019 01:54:00	30	25	34	28	28	100	25	5
82	786851	04/16/2019 01:55:00	28	23	33	27	28	97	25	5
82	786851	04/16/2019 01:56:00	24	22	27	23	29	88	26	4
82	786851	04/16/2019 01:57:00	24	20	28	23	28	95	25	6
82	786851	04/16/2019 01:58:00	21	16	28	21	29	100	25	9
82	786851	04/16/2019 01:59:00	23	20	27	22	26	100	24	8
82	786851	04/16/2019 02:00:00	16	13	21	15	20	99	27	8
82	786851	04/16/2019 02:01:00	16	14	18	16	22	88	25	6
82	786851	04/16/2019 02:02:00	17	16	21	17	25	100	24	9
82	786851	04/16/2019 02:03:00	22	17	26	21	26	100	25	8
82	786851	04/16/2019 02:04:00	24	19	32	23	25	86	30	3
82	786851	04/16/2019 02:05:00	28	20	36	26	27	86	25	6
82	786851	04/16/2019 02:06:00	25	22	29	24	26	90	25	4
82	786851	04/16/2019 02:07:00	20	16	28	19	22	92	25	4
82	786851	04/16/2019 02:08:00	23	17	28	22	24	100	25	4
82	786851	04/16/2019 02:09:00	18	16	23	18	26	100	25	6
82	786851	04/16/2019 02:10:00	19	16	23	18	23	100	25	5
82	786851	04/16/2019 02:11:00	21	16	28	20	25	100	25	6
82	786851	04/16/2019 02:12:00	32	21	36	31	34	95	30	3
82	786851	04/16/2019 02:13:00	30	25	36	28	28	100	26	2
82	786851	04/16/2019 02:14:00	26	20	34	24	28	100	26	5
82	786851	04/16/2019 02:15:00	21	17	26	20	27	96	26	6
82	786851	04/16/2019 02:16:00	17	16	19	17	25	92	27	5
82	786851	04/16/2019 02:17:00	28	18	37	27	30	78	31	1
82	786851	04/16/2019 02:18:00	44	38	57	42	42	84	34	2
82	786851	04/16/2019 02:19:00	41	39	47	39	39	72	37	0
82	786851	04/16/2019 02:20:00	38	32	47	36	36	81	28	1
89	1610664	06/28/2019 18:16:00	36	19	47	36	41	58	30	33
89	1610664	06/28/2019 18:17:00	16	13	22	16	19	95	26	62
89	1610664	06/28/2019 18:18:00	19	15	27	19	23	84	34	56
89	1610664	06/28/2019 18:19:00	33	28	41	33	39	92	28	38
89	1610664	06/28/2019 18:20:00	34	22	52	34	38	96	30	38
89	1610664	06/28/2019 18:21:00	29	15	51	29	33	93	26	45
89	1610664	06/28/2019 18:22:00	17	15	19	17	20	96	26	60
89	1610664	06/28/2019 18:23:00	18	16	21	18	22	100	25	57
89	1610664	06/28/2019 18:24:00	27	17	38	27	30	96	31	41
89	1610664	06/28/2019 18:25:00	40	38	41	40	40	85	32	14
89	1610664	06/28/2019 18:26:00	30	20	43	30	35	82	26	36
89	1610664	06/28/2019 18:27:00	23	18	29	23	27	97	27	49
89	1610664	06/28/2019 18:28:00	28	20	32	28	33	98	26	41
89	1610664	06/28/2019 18:29:00	15	12	21	15	18	97	25	64
89	1610664	06/28/2019 18:30:00	11	10	14	11	13	95	25	73
89	1610664	06/28/2019 18:31:00	12	10	15	12	15	96	25	70
89	1610664	06/28/2019 18:32:00	12	10	15	12	15	95	25	70
89	1610664	06/28/2019 18:33:00	14	13	16	14	17	100	25	66
89	1610664	06/28/2019 18:34:00	15	13	20	15	18	94	25	64
89	1610664	06/28/2019 18:35:00	25	21	28	25	29	97	27	42
89	1610664	06/28/2019 18:36:00	29	26	32	29	33	84	26	36
89	1610664	06/28/2019 18:37:00	29	26	34	29	33	100	25	36
89	1610664	06/28/2019 18:38:00	34	29	38	34	37	100	27	26
89	1610664	06/28/2019 18:39:00	31	23	37	31	34	97	26	35
89	1610664	06/28/2019 18:40:00	25	22	29	25	30	100	26	44
89	1610664	06/28/2019 18:41:00	23	19	29	23	27	89	25	48
89	1610664	06/28/2019 18:42:00	20	16	29	20	24	60	25	52
89	1610664	06/28/2019 18:43:00	23	19	27	23	27	98	25	48
89	1610664	06/28/2019 18:44:00	26	24	29	26	30	96	25	44
89	1610664	06/28/2019 18:45:00	22	18	26	22	26	97	25	50
89	1610664	06/28/2019 18:46:00	18	16	20	18	21	73	26	57
89	1610664	06/28/2019 18:47:00	23	20	30	23	28	64	25	45
89	1610664	06/28/2019 18:48:00	28	22	32	28	34	41	25	35
89	1610664	06/28/2019 18:49:00	19	13	22	19	22	55	25	56
89	1610664	06/28/2019 18:50:00	22	18	26	22	27	60	28	48
89	1610664	06/28/2019 18:51:00	26	24	28	26	31	5	30	38
89	1610664	06/28/2019 18:52:00	255	255	255	255	255	0	30	255
89	1610664	06/28/2019 18:53:00	255	255	255	255	255	2	29	255
89	1610664	06/28/2019 18:54:00	42	32	66	41	45	49	26	17
89	1610664	06/28/2019 18:55:00	32	27	36	31	37	71	27	25
89	1610664	06/28/2019 18:56:00	38	26	43	38	42	70	31	10
89	1610664	06/28/2019 18:57:00	26	23	42	26	34	20	29	15
89	1610664	06/28/2019 18:58:00	27	25	31	27	34	17	30	27
89	1610664	06/28/2019 18:59:00	34	29	50	34	41	21	36	25
89	1610664	06/28/2019 19:00:00	44	38	57	50	59	64	36	17
89	1610664	06/28/2019 19:01:00	45	42	49	45	47	83	37	16
89	1610664	06/28/2019 19:02:00	54	39	68	54	57	66	34	16
89	1610664	06/28/2019 19:03:00	31	15	47	31	36	76	26	37
89	1610664	06/28/2019 19:04:00	15	13	16	15	18	93	27	64
89	1610664	06/28/2019 19:05:00	14	13	16	14	17	100	27	66
89	1610664	06/28/2019 19:06:00	16	15	19	16	19	89	29	61
89	1610664	06/28/2019 19:07:00	30	17	41	30	34	81	37	39
89	1610664	06/28/2019 19:08:00	34	31	40	34	38	91	29	37
89	1610664	06/28/2019 19:09:00	35	29	39	39	46	89	30	32
89	1610664	06/28/2019 19:10:00	27	20	32	27	32	94	34	44
89	1610664	06/28/2019 19:11:00	30	24	36	30	37	84	35	36
89	1610664	06/28/2019 19:12:00	21	17	29	21	25	89	29	51
89	1610664	06/28/2019 19:13:00	22	19	30	22	26	97	27	49
89	1610664	06/28/2019 19:14:00	30	26	34	30	34	95	31	38
89	1610664	06/28/2019 19:15:00	32	28	36	32	38	92	30	34
89	1610664	06/28/2019 19:16:00	37	30	42	37	41	88	32	26
89	1610664	06/28/2019 19:17:00	36	26	43	37	40	83	27	28
89	1610664	06/28/2019 19:18:00	27	23	31	27	32	87	27	40
89	1610664	06/28/2019 19:19:00	24	19	32	24	29	41	26	44
89	1610664	06/28/2019 19:20:00	18	16	21	18	21	93	28	57
89	1610664	06/28/2019 19:21:00	18	16	22	18	21	97	27	57
89	1610664	06/28/2019 19:22:00	20	19	22	20	24	99	27	52
89	1610664	06/28/2019 19:23:00	20	18	24	20	24	94	26	52
89	1610664	06/28/2019 19:24:00	17	16	20	17	21	99	25	59
89	1610664	06/28/2019 19:25:00	14	12	17	14	17	98	25	67
89	1610664	06/28/2019 19:26:00	16	14	18	16	19	94	26	63
89	1610664	06/28/2019 19:27:00	15	12	18	15	18	82	25	65
89	1610664	06/28/2019 19:28:00	19	16	23	19	23	95	27	55
89	1610664	06/28/2019 19:29:00	29	20	35	29	33	87	32	38
89	1610664	06/28/2019 19:30:00	26	19	36	26	30	96	26	43
89	1610664	06/28/2019 19:31:00	24	18	32	24	28	94	26	46
89	1610664	06/28/2019 19:32:00	34	30	37	34	37	99	25	29
89	1610664	06/28/2019 19:33:00	25	20	30	25	30	98	25	44
89	1610664	06/28/2019 19:34:00	23	20	26	23	28	94	25	46
89	1610664	06/28/2019 19:35:00	24	21	27	24	29	98	25	44
89	1610664	06/28/2019 19:36:00	25	22	28	25	29	95	26	44
89	1610664	06/28/2019 19:37:00	26	23	29	26	31	84	25	42
89	1610664	06/28/2019 19:38:00	26	23	28	26	31	100	25	42
89	1610664	06/28/2019 19:39:00	29	27	32	29	33	100	25	38
89	1610664	06/28/2019 19:40:00	30	27	33	30	33	100	25	38
89	1610664	06/28/2019 19:41:00	30	26	34	30	34	86	25	39
89	1610664	06/28/2019 19:42:00	35	32	37	35	38	94	26	30
89	1610664	06/28/2019 19:43:00	34	32	37	34	38	95	26	29
89	1610664	06/28/2019 19:44:00	34	30	37	34	39	88	26	29
89	1610664	06/28/2019 19:45:00	30	26	34	30	36	92	25	35
89	1610664	06/28/2019 19:46:00	27	21	33	27	31	67	25	43
89	1610664	06/28/2019 19:47:00	31	26	35	31	34	80	25	37
89	1610664	06/28/2019 19:48:00	28	26	31	28	32	98	25	40
89	1610664	06/28/2019 19:49:00	33	30	37	33	36	98	25	33
89	1610664	06/28/2019 19:50:00	40	36	42	40	43	75	27	28
89	1610664	06/28/2019 19:51:00	35	29	41	35	39	67	27	34
89	1610664	06/28/2019 19:52:00	32	28	34	32	35	91	26	33
89	1610664	06/28/2019 19:53:00	34	32	37	34	38	98	26	34
89	1610664	06/28/2019 19:54:00	29	25	35	29	34	100	25	41
89	1610664	06/28/2019 19:55:00	35	25	43	35	39	100	26	33
89	1610664	06/28/2019 19:56:00	39	36	43	39	46	100	26	24
89	1610664	06/28/2019 19:57:00	41	37	47	41	46	85	27	23
89	1610664	06/28/2019 19:58:00	42	38	44	42	48	98	28	20
89	1610664	06/28/2019 19:59:00	37	34	44	37	44	100	28	21
89	1610664	06/28/2019 20:00:00	45	42	50	45	51	100	28	13
89	1610664	06/28/2019 20:01:00	47	44	49	47	50	96	32	17
89	1610664	06/28/2019 20:02:00	43	35	49	43	51	93	28	19
89	1610664	06/28/2019 20:03:00	47	42	49	46	52	100	29	19
89	1610664	06/28/2019 20:04:00	47	40	50	46	52	95	28	16
89	1610664	06/28/2019 20:05:00	46	39	51	46	56	95	29	16
89	1610664	06/28/2019 20:06:00	38	36	43	38	46	97	27	19
89	1610664	06/28/2019 20:07:00	36	33	40	36	43	85	27	25
89	1610664	06/28/2019 20:08:00	38	34	42	38	46	95	25	24
89	1610664	06/28/2019 20:09:00	39	37	42	39	47	100	25	24
89	1610664	06/28/2019 20:10:00	38	34	43	38	45	100	25	26
89	1610664	06/28/2019 20:11:00	44	39	49	44	49	100	27	17
89	1610664	06/28/2019 20:12:00	39	34	44	39	46	100	26	28
89	1610664	06/28/2019 20:13:00	37	32	42	37	44	100	25	33
89	1610664	06/28/2019 20:14:00	38	34	42	38	50	100	26	24
89	1610664	06/28/2019 20:15:00	35	32	37	35	43	100	25	30
89	1610664	06/28/2019 20:16:00	38	36	40	38	48	100	25	20
89	1610664	06/28/2019 20:17:00	32	26	39	32	39	90	26	36
89	1610664	06/28/2019 20:18:00	34	28	41	34	40	93	25	34
89	1610664	06/28/2019 20:19:00	34	30	40	34	40	100	25	33
89	1610664	06/28/2019 20:20:00	31	29	35	31	36	100	25	36
89	1610664	06/28/2019 20:21:00	29	26	32	29	33	100	25	40
89	1610664	06/28/2019 20:22:00	34	29	41	34	38	100	25	34
89	1610664	06/28/2019 20:23:00	35	29	38	35	43	100	25	21
89	1610664	06/28/2019 20:24:00	32	27	37	32	37	100	25	35
89	1610664	06/28/2019 20:25:00	31	28	35	31	35	100	25	34
89	1610664	06/28/2019 20:26:00	31	25	34	31	34	100	25	36
89	1610664	06/28/2019 20:27:00	28	25	32	28	33	92	26	41
89	1610664	06/28/2019 20:28:00	31	29	34	31	35	91	25	36
89	1610664	06/28/2019 20:29:00	32	24	36	32	36	85	26	35
89	1610664	06/28/2019 20:30:00	25	20	28	25	29	39	25	43
89	1610664	06/28/2019 20:31:00	27	24	30	27	31	94	25	41
89	1610664	06/28/2019 20:32:00	29	28	31	29	33	100	25	37
89	1610664	06/28/2019 20:33:00	31	27	37	31	35	100	25	38
89	1610664	06/28/2019 20:34:00	39	35	43	38	43	93	27	22
89	1610664	06/28/2019 20:35:00	39	36	43	39	44	98	26	25
89	1610664	06/28/2019 20:36:00	33	29	40	33	40	96	27	37
89	1610664	06/28/2019 20:37:00	39	30	44	39	46	67	27	17
89	1610664	06/28/2019 20:38:00	28	24	35	28	33	56	27	35
89	1610664	06/28/2019 20:39:00	36	32	40	36	41	70	25	19
89	1610664	06/28/2019 20:40:00	41	35	47	40	47	54	27	6
89	1610664	06/28/2019 20:41:00	46	39	51	46	54	78	25	16
89	1610664	06/28/2019 20:42:00	36	28	45	36	42	54	25	28
89	1610664	06/28/2019 20:43:00	36	33	39	36	43	94	25	21
89	1610664	06/28/2019 20:44:00	39	34	44	38	45	100	25	21
89	1610664	06/28/2019 20:45:00	42	36	45	41	47	100	25	21
89	1610664	06/28/2019 20:46:00	37	35	40	37	44	89	24	22
89	1610664	06/28/2019 20:47:00	40	37	42	39	44	90	26	24
89	1610664	06/28/2019 20:48:00	36	33	39	36	44	85	25	22
89	1610664	06/28/2019 20:49:00	39	33	44	39	46	100	25	21
89	1610664	06/28/2019 20:50:00	41	34	45	40	46	100	25	17
89	1610664	06/28/2019 20:51:00	42	37	47	42	49	100	26	17
89	1610664	06/28/2019 20:52:00	40	35	44	40	48	100	25	17
89	1610664	06/28/2019 20:53:00	38	34	43	38	45	100	25	24
89	1610664	06/28/2019 20:54:00	42	39	45	41	46	100	25	17
89	1610664	06/28/2019 20:55:00	38	36	42	38	45	100	25	21
89	1610664	06/28/2019 20:56:00	41	39	42	40	47	100	25	16
89	1610664	06/28/2019 20:57:00	43	40	46	42	48	100	25	18
89	1610664	06/28/2019 20:58:00	41	37	45	41	49	84	25	19
89	1610664	06/28/2019 20:59:00	38	34	43	38	44	99	26	19
89	1610664	06/28/2019 21:00:00	42	36	48	42	49	100	26	20
89	1610664	06/28/2019 21:01:00	45	42	47	44	47	99	27	16
89	1610664	06/28/2019 21:02:00	38	32	44	38	46	97	25	12
89	1610664	06/28/2019 21:03:00	41	36	48	41	49	99	25	11
89	1610664	06/28/2019 21:04:00	44	35	51	43	51	100	27	11
89	1610664	06/28/2019 21:05:00	45	39	49	43	46	100	25	10
89	1610664	06/28/2019 21:06:00	37	33	50	37	45	90	32	7
89	1610664	06/28/2019 21:07:00	44	35	50	43	45	78	29	8
89	1610664	06/28/2019 21:08:00	47	40	52	45	46	66	29	2
89	1610664	06/28/2019 21:09:00	42	37	48	41	46	95	28	5
89	1610664	06/28/2019 21:10:00	40	34	48	40	44	97	26	6
89	1610664	06/28/2019 21:11:00	40	37	46	40	47	94	25	4
89	1610664	06/28/2019 21:12:00	46	38	51	46	51	97	28	4
89	1610664	06/28/2019 21:13:00	45	40	50	44	47	94	28	3
89	1610664	06/28/2019 21:14:00	41	38	46	40	46	74	30	2
89	1610664	06/28/2019 21:15:00	45	41	50	44	47	84	28	6
89	1610664	06/28/2019 21:16:00	52	50	53	53	63	100	36	6
89	1610664	06/28/2019 21:17:00	56	52	66	66	73	98	41	1
89	1610664	06/28/2019 21:18:00	65	56	70	75	77	82	41	0
89	1610664	06/28/2019 21:19:00	66	61	72	67	68	95	44	0
89	1610664	06/28/2019 21:20:00	67	61	73	67	67	92	50	0
89	1610664	06/28/2019 21:21:00	74	73	79	75	75	93	51	0
89	1610664	06/28/2019 21:22:00	78	74	85	87	91	100	55	0
89	1610664	06/28/2019 21:23:00	78	72	88	95	98	48	32	0
89	1610664	06/28/2019 21:24:00	255	255	255	255	255	0	25	255
89	1610664	06/28/2019 21:25:00	255	255	255	255	255	0	25	255
89	1610664	06/28/2019 21:26:00	255	255	255	255	255	0	25	255
89	1610664	06/28/2019 21:27:00	255	255	255	255	255	0	25	255
92	1611751	07/06/2019 14:51:00	15	7	24	15	18	87	26	64
92	1611751	07/06/2019 14:52:00	3	0	6	3	3	100	27	94
92	1611751	07/06/2019 14:53:00	7	4	8	7	8	100	27	84
92	1611751	07/06/2019 14:54:00	2	0	4	2	2	100	27	96
92	1611751	07/06/2019 14:55:00	1	0	1	1	1	100	27	99
92	1611751	07/06/2019 14:56:00	1	0	1	1	1	100	27	99
92	1611751	07/06/2019 14:57:00	1	0	3	1	2	99	30	97
92	1611751	07/06/2019 14:58:00	2	0	3	2	2	84	28	95
92	1611751	07/06/2019 14:59:00	0	0	1	0	1	89	28	99
92	1611751	07/06/2019 15:00:00	5	1	9	5	6	60	28	88
92	1611751	07/06/2019 15:01:00	5	2	7	5	6	94	28	89
92	1611751	07/06/2019 15:02:00	4	2	11	4	5	100	30	91
92	1611751	07/06/2019 15:03:00	17	11	21	17	20	100	30	60
92	1611751	07/06/2019 15:04:00	18	15	20	18	21	100	29	58
92	1611751	07/06/2019 15:05:00	15	8	18	15	18	77	28	64
92	1611751	07/06/2019 15:06:00	4	2	8	4	5	76	28	91
92	1611751	07/06/2019 15:07:00	4	1	8	4	5	75	28	91
92	1611751	07/06/2019 15:08:00	10	8	13	10	12	84	30	76
92	1611751	07/06/2019 15:09:00	13	9	16	13	16	99	28	68
92	1611751	07/06/2019 15:10:00	16	14	18	16	19	100	28	61
92	1611751	07/06/2019 15:11:00	14	11	17	14	17	100	28	67
92	1611751	07/06/2019 15:12:00	6	4	11	6	7	100	27	86
92	1611751	07/06/2019 15:13:00	11	4	21	11	13	100	28	74
92	1611751	07/06/2019 15:14:00	29	21	33	28	33	98	28	39
92	1611751	07/06/2019 15:15:00	29	24	33	28	32	100	29	40
92	1611751	07/06/2019 15:16:00	31	26	36	31	37	98	28	24
93	1615580	08/07/2019 10:24:00	29	26	32	29	35	10	41	30
93	1615580	08/07/2019 10:25:00	25	18	34	25	29	73	33	46
93	1615580	08/07/2019 10:26:00	19	16	25	19	22	90	37	56
93	1615580	08/07/2019 10:27:00	21	9	36	21	24	84	30	54
93	1615580	08/07/2019 10:28:00	3	0	9	3	4	97	27	93
93	1615580	08/07/2019 10:29:00	0	0	1	0	1	100	27	99
93	1615580	08/07/2019 10:30:00	0	0	1	0	0	100	27	99
93	1615580	08/07/2019 10:31:00	0	0	0	0	0	100	27	100
93	1615580	08/07/2019 10:32:00	0	0	0	0	0	95	27	100
93	1615580	08/07/2019 10:33:00	1	0	3	1	1	34	27	98
93	1615580	08/07/2019 10:34:00	5	4	8	5	6	33	27	89
93	1615580	08/07/2019 10:35:00	6	3	10	6	7	33	27	87
93	1615580	08/07/2019 10:36:00	9	3	15	9	11	86	29	78
93	1615580	08/07/2019 10:37:00	4	0	16	4	5	69	28	89
93	1615580	08/07/2019 10:38:00	4	1	7	4	5	99	31	91
93	1615580	08/07/2019 10:39:00	3	0	6	3	4	98	28	93
93	1615580	08/07/2019 10:40:00	2	0	11	2	2	78	36	95
93	1615580	08/07/2019 10:41:00	17	13	23	17	20	64	36	59
93	1615580	08/07/2019 10:42:00	14	10	20	14	17	65	35	67
93	1615580	08/07/2019 10:43:00	7	4	17	7	9	73	29	82
93	1615580	08/07/2019 10:44:00	5	3	9	5	6	56	31	87
93	1615580	08/07/2019 10:45:00	3	2	4	3	4	71	27	93
93	1615580	08/07/2019 10:46:00	1	0	3	1	2	98	27	97
93	1615580	08/07/2019 10:47:00	4	0	13	4	4	75	32	91
93	1615580	08/07/2019 10:48:00	9	0	15	9	11	74	28	79
93	1615580	08/07/2019 10:49:00	1	0	3	1	2	85	29	97
93	1615580	08/07/2019 10:50:00	3	2	6	3	4	73	30	92
93	1615580	08/07/2019 10:51:00	6	3	11	6	7	65	27	85
93	1615580	08/07/2019 10:52:00	1	0	3	1	1	100	27	99
93	1615580	08/07/2019 10:53:00	3	0	7	3	3	76	28	94
93	1615580	08/07/2019 10:54:00	12	7	21	12	15	68	42	71
93	1615580	08/07/2019 10:55:00	15	2	25	15	17	61	29	66
93	1615580	08/07/2019 10:56:00	5	2	8	5	6	74	29	88
93	1615580	08/07/2019 10:57:00	3	2	6	3	4	61	29	92
93	1615580	08/07/2019 10:58:00	5	2	8	5	6	60	32	88
93	1615580	08/07/2019 10:59:00	7	4	15	7	8	72	36	83
93	1615580	08/07/2019 11:00:00	11	1	16	11	13	67	29	73
93	1615580	08/07/2019 11:01:00	9	1	21	9	11	72	34	79
93	1615580	08/07/2019 11:02:00	17	11	25	17	20	65	32	60
93	1615580	08/07/2019 11:03:00	5	0	10	5	6	80	28	88
93	1615580	08/07/2019 11:04:00	0	0	0	0	0	95	27	100
93	1615580	08/07/2019 11:05:00	2	0	7	2	3	78	32	95
93	1615580	08/07/2019 11:06:00	4	0	7	4	5	97	28	90
93	1615580	08/07/2019 11:07:00	2	0	5	2	3	77	28	95
93	1615580	08/07/2019 11:08:00	2	0	5	2	3	87	26	94
93	1615580	08/07/2019 11:09:00	0	0	0	0	0	93	27	99
93	1615580	08/07/2019 11:10:00	0	0	0	0	0	99	27	100
93	1615580	08/07/2019 11:11:00	4	0	10	4	4	67	27	91
93	1615580	08/07/2019 11:12:00	3	0	8	3	4	73	27	92
93	1615580	08/07/2019 11:13:00	1	0	1	1	1	98	27	99
93	1615580	08/07/2019 11:14:00	0	0	1	0	0	99	26	100
93	1615580	08/07/2019 11:15:00	0	0	0	0	0	81	28	100
93	1615580	08/07/2019 11:16:00	0	0	0	0	0	95	27	100
93	1615580	08/07/2019 11:17:00	0	0	0	0	0	100	26	99
93	1615580	08/07/2019 11:18:00	3	0	5	3	4	100	29	92
93	1615580	08/07/2019 11:19:00	4	4	5	4	5	100	29	89
93	1615580	08/07/2019 11:20:00	5	4	8	5	6	100	28	88
93	1615580	08/07/2019 11:21:00	1	0	4	1	1	100	27	99
93	1615580	08/07/2019 11:22:00	0	0	0	0	0	100	27	100
93	1615580	08/07/2019 11:23:00	0	0	0	0	0	100	26	100
93	1615580	08/07/2019 11:24:00	0	0	0	0	0	100	27	100
93	1615580	08/07/2019 11:25:00	0	0	0	0	0	90	28	100
93	1615580	08/07/2019 11:26:00	1	0	7	1	1	84	29	98
93	1615580	08/07/2019 11:27:00	13	8	26	13	16	94	31	69
93	1615580	08/07/2019 11:28:00	32	18	48	31	35	95	30	41
93	1615580	08/07/2019 11:29:00	20	13	26	20	23	100	28	55
93	1615580	08/07/2019 11:30:00	12	9	16	12	15	71	27	71
93	1615580	08/07/2019 11:31:00	12	12	12	12	15	1	25	70
93	1615580	08/07/2019 11:32:00	255	255	255	255	255	0	25	255
94	1616034	08/10/2019 17:34:00	2	27	86	88	96	13	48	0
94	1616034	08/10/2019 17:35:00	69	60	76	72	77	68	40	3
94	1616034	08/10/2019 17:36:00	56	32	65	56	65	87	37	10
94	1616034	08/10/2019 17:37:00	40	32	46	40	44	83	33	6
94	1616034	08/10/2019 17:38:00	42	33	56	42	49	69	35	7
94	1616034	08/10/2019 17:39:00	2	27	50	38	42	74	33	9
94	1616034	08/10/2019 17:40:00	38	22	48	37	40	88	28	24
94	1616034	08/10/2019 17:41:00	15	11	21	15	18	91	28	64
94	1616034	08/10/2019 17:42:00	17	13	26	17	21	95	28	59
94	1616034	08/10/2019 17:43:00	24	16	30	24	27	96	27	49
94	1616034	08/10/2019 17:44:00	15	14	18	15	18	92	29	63
94	1616034	08/10/2019 17:45:00	33	18	46	33	37	84	30	37
94	1616034	08/10/2019 17:46:00	26	14	39	26	31	98	27	44
94	1616034	08/10/2019 17:47:00	18	14	29	18	21	100	30	58
94	1616034	08/10/2019 17:48:00	37	30	41	36	42	92	30	23
94	1616034	08/10/2019 17:49:00	25	15	36	24	28	98	28	47
94	1616034	08/10/2019 17:50:00	17	14	20	17	20	94	36	60
94	1616034	08/10/2019 17:51:00	37	20	53	37	42	61	35	31
94	1616034	08/10/2019 17:52:00	34	24	50	33	35	86	28	30
94	1616034	08/10/2019 17:53:00	20	19	24	20	24	93	30	52
94	1616034	08/10/2019 17:54:00	27	20	33	27	31	81	29	42
94	1616034	08/10/2019 17:55:00	26	22	29	26	30	83	28	43
94	1616034	08/10/2019 17:56:00	19	12	28	19	23	100	28	56
94	1616034	08/10/2019 17:57:00	12	9	15	12	15	100	28	70
94	1616034	08/10/2019 17:58:00	10	8	14	10	12	100	27	77
94	1616034	08/10/2019 17:59:00	15	13	17	15	18	100	28	63
94	1616034	08/10/2019 18:00:00	13	12	15	13	15	100	27	69
94	1616034	08/10/2019 18:01:00	11	9	13	11	13	98	29	75
94	1616034	08/10/2019 18:02:00	15	11	21	15	18	91	30	64
94	1616034	08/10/2019 18:03:00	23	16	40	23	27	94	31	51
94	1616034	08/10/2019 18:04:00	64	41	70	64	64	93	32	13
94	1616034	08/10/2019 18:05:00	69	64	75	69	76	69	33	2
94	1616034	08/10/2019 18:06:00	64	53	75	64	69	90	30	20
94	1616034	08/10/2019 18:07:00	59	49	70	58	60	99	30	27
94	1616034	08/10/2019 18:08:00	39	25	57	39	45	98	29	36
94	1616034	08/10/2019 18:09:00	25	22	31	25	29	100	28	43
94	1616034	08/10/2019 18:10:00	26	20	31	26	31	100	28	46
94	1616034	08/10/2019 18:11:00	39	28	46	39	48	93	30	32
94	1616034	08/10/2019 18:12:00	51	46	54	52	63	95	30	14
94	1616034	08/10/2019 18:13:00	50	48	53	50	58	85	30	15
94	1616034	08/10/2019 18:14:00	52	51	54	53	70	60	29	9
94	1616034	08/10/2019 18:15:00	50	47	52	50	57	79	29	14
94	1616034	08/10/2019 18:16:00	49	47	54	50	50	84	29	7
94	1616034	08/10/2019 18:17:00	56	46	63	56	56	84	31	6
94	1616034	08/10/2019 18:18:00	59	53	63	58	54	66	30	3
94	1616034	08/10/2019 18:19:00	2	27	62	59	57	53	30	0
94	1616034	08/10/2019 18:20:00	58	53	61	58	62	76	29	1
94	1616034	08/10/2019 18:21:00	62	57	67	62	65	92	28	7
94	1616034	08/10/2019 18:22:00	56	52	61	55	58	86	27	10
94	1616034	08/10/2019 18:23:00	58	55	60	58	60	55	31	5
94	1616034	08/10/2019 18:24:00	2	27	55	48	49	54	30	10
94	1616034	08/10/2019 18:25:00	49	43	53	48	48	55	32	7
94	1616034	08/10/2019 18:26:00	41	40	43	41	41	56	32	6
94	1616034	08/10/2019 18:27:00	41	40	46	41	41	67	28	8
94	1616034	08/10/2019 18:28:00	46	40	50	44	44	30	28	7
94	1616034	08/10/2019 18:29:00	2	27	54	48	47	32	28	7
94	1616034	08/10/2019 18:30:00	44	36	55	43	45	54	28	13
94	1616034	08/10/2019 18:31:00	48	41	52	47	53	75	28	7
94	1616034	08/10/2019 18:32:00	56	48	63	56	62	61	28	11
94	1616034	08/10/2019 18:33:00	64	60	69	64	64	69	28	8
94	1616034	08/10/2019 18:34:00	63	54	66	62	66	17	30	3
94	1616034	08/10/2019 18:35:00	255	255	255	255	255	0	28	255
94	1616034	08/10/2019 18:36:00	47	41	56	46	49	13	29	3
101	1618519	08/31/2019 12:23:00	45	40	47	42	42	44	28	1
101	1618519	08/31/2019 12:24:00	38	33	49	37	43	94	25	1
101	1618519	08/31/2019 12:25:00	31	27	35	31	39	95	25	1
101	1618519	08/31/2019 12:26:00	35	30	40	34	41	98	25	0
101	1618519	08/31/2019 12:27:00	41	36	46	40	45	99	25	0
101	1618519	08/31/2019 12:28:00	37	32	43	37	43	97	25	0
101	1618519	08/31/2019 12:29:00	32	29	36	32	41	98	25	0
101	1618519	08/31/2019 12:30:00	38	35	44	37	44	97	26	0
101	1618519	08/31/2019 12:31:00	35	32	40	35	43	94	25	0
101	1618519	08/31/2019 12:32:00	38	31	44	37	43	95	25	1
101	1618519	08/31/2019 12:33:00	39	35	43	38	46	85	26	0
101	1618519	08/31/2019 12:34:00	38	30	45	37	44	91	25	0
101	1618519	08/31/2019 12:35:00	36	32	42	36	44	92	25	0
101	1618519	08/31/2019 12:36:00	35	31	41	35	41	92	25	0
101	1618519	08/31/2019 12:37:00	39	33	45	38	42	96	25	0
101	1618519	08/31/2019 12:38:00	39	31	45	38	43	100	25	0
101	1618519	08/31/2019 12:39:00	41	37	45	40	46	96	25	0
101	1618519	08/31/2019 12:40:00	40	35	44	38	42	96	25	0
101	1618519	08/31/2019 12:41:00	36	32	46	35	41	96	29	0
101	1618519	08/31/2019 12:42:00	42	40	46	41	46	69	29	0
101	1618519	08/31/2019 12:43:00	39	34	44	37	42	63	27	0
101	1618519	08/31/2019 12:44:00	36	32	40	35	39	90	25	0
101	1618519	08/31/2019 12:45:00	39	37	42	38	42	95	25	0
101	1618519	08/31/2019 12:46:00	38	30	44	37	43	97	25	0
101	1618519	08/31/2019 12:47:00	37	31	42	36	41	99	25	1
101	1618519	08/31/2019 12:48:00	39	35	40	38	40	100	25	0
101	1618519	08/31/2019 12:49:00	37	32	41	37	41	95	26	0
101	1618519	08/31/2019 12:50:00	38	32	45	36	41	70	28	0
101	1618519	08/31/2019 12:51:00	37	34	40	36	41	92	27	0
101	1618519	08/31/2019 12:52:00	41	37	46	40	41	37	26	0
101	1618519	08/31/2019 12:53:00	40	33	48	38	39	44	26	0
101	1618519	08/31/2019 12:54:00	41	36	44	39	38	55	25	0
101	1618519	08/31/2019 12:55:00	43	39	46	41	42	82	25	0
101	1618519	08/31/2019 12:56:00	41	38	43	39	41	44	24	0
101	1618519	08/31/2019 12:57:00	44	43	44	41	41	13	25	0
101	1618519	08/31/2019 12:58:00	42	37	45	39	39	18	28	0
101	1618519	08/31/2019 12:59:00	37	31	42	35	38	22	26	0
101	1618519	08/31/2019 13:00:00	33	29	41	32	38	81	26	0
101	1618519	08/31/2019 13:01:00	41	38	47	40	41	57	26	0
101	1618519	08/31/2019 13:02:00	42	39	50	40	40	64	27	0
101	1618519	08/31/2019 13:03:00	44	40	50	42	43	59	27	0
101	1618519	08/31/2019 13:04:00	42	34	46	40	41	82	28	0
101	1618519	08/31/2019 13:05:00	44	33	50	42	44	95	29	0
101	1618519	08/31/2019 13:06:00	45	39	48	43	42	89	27	0
101	1618519	08/31/2019 13:07:00	42	35	46	41	43	65	29	0
101	1618519	08/31/2019 13:08:00	40	36	43	39	43	87	26	0
101	1618519	08/31/2019 13:09:00	45	39	49	44	46	80	28	0
101	1618519	08/31/2019 13:10:00	44	42	46	42	43	67	27	0
101	1618519	08/31/2019 13:11:00	43	39	46	41	42	96	25	0
101	1618519	08/31/2019 13:12:00	43	41	46	42	44	91	27	0
101	1618519	08/31/2019 13:13:00	44	40	49	42	44	71	26	0
101	1618519	08/31/2019 13:14:00	44	41	48	43	44	80	26	0
101	1618519	08/31/2019 13:15:00	42	39	49	40	40	94	26	0
101	1618519	08/31/2019 13:16:00	35	26	41	33	37	60	27	0
101	1618519	08/31/2019 13:17:00	40	26	47	38	40	67	28	0
101	1618519	08/31/2019 13:18:00	43	39	47	41	41	89	26	0
101	1618519	08/31/2019 13:19:00	42	40	47	40	42	79	26	0
101	1618519	08/31/2019 13:20:00	42	39	44	40	40	78	26	0
101	1618519	08/31/2019 13:21:00	42	39	46	40	40	97	26	0
101	1618519	08/31/2019 13:22:00	44	39	47	41	41	99	25	0
101	1618519	08/31/2019 13:23:00	40	36	47	38	38	98	26	0
101	1618519	08/31/2019 13:24:00	40	37	44	38	40	79	25	0
101	1618519	08/31/2019 13:25:00	43	41	45	42	42	94	25	0
101	1618519	08/31/2019 13:26:00	42	40	46	40	40	100	25	0
101	1618519	08/31/2019 13:27:00	41	34	43	38	39	96	25	0
101	1618519	08/31/2019 13:28:00	44	40	49	42	42	99	25	0
101	1618519	08/31/2019 13:29:00	43	41	46	41	41	96	25	0
101	1618519	08/31/2019 13:30:00	43	39	47	41	41	96	25	0
101	1618519	08/31/2019 13:31:00	44	41	49	42	42	98	25	0
101	1618519	08/31/2019 13:32:00	42	38	45	40	41	99	25	0
101	1618519	08/31/2019 13:33:00	43	42	46	42	42	97	25	0
101	1618519	08/31/2019 13:34:00	43	41	45	41	41	79	26	0
101	1618519	08/31/2019 13:35:00	42	40	44	40	39	91	25	1
101	1618519	08/31/2019 13:36:00	43	39	48	40	41	96	25	0
101	1618519	08/31/2019 13:37:00	45	40	49	42	41	99	25	0
101	1618519	08/31/2019 13:38:00	41	37	45	39	42	98	25	0
101	1618519	08/31/2019 13:39:00	39	35	41	38	42	99	25	0
101	1618519	08/31/2019 13:40:00	40	37	47	39	40	94	25	0
101	1618519	08/31/2019 13:41:00	45	40	48	42	42	98	25	1
101	1618519	08/31/2019 13:42:00	43	40	46	41	42	99	25	0
101	1618519	08/31/2019 13:43:00	44	40	46	42	42	97	25	0
101	1618519	08/31/2019 13:44:00	44	42	47	42	42	85	26	0
101	1618519	08/31/2019 13:45:00	43	40	46	40	40	92	25	0
101	1618519	08/31/2019 13:46:00	43	40	47	41	42	98	25	0
101	1618519	08/31/2019 13:47:00	42	34	48	40	43	81	26	0
101	1618519	08/31/2019 13:48:00	39	36	44	37	40	91	25	0
101	1618519	08/31/2019 13:49:00	45	43	48	42	42	85	27	0
101	1618519	08/31/2019 13:50:00	41	39	44	39	41	81	26	0
101	1618519	08/31/2019 13:51:00	45	40	48	43	43	97	25	0
101	1618519	08/31/2019 13:52:00	40	34	46	38	40	98	25	0
101	1618519	08/31/2019 13:53:00	46	39	52	43	42	97	25	0
101	1618519	08/31/2019 13:54:00	44	41	46	41	41	83	26	1
101	1618519	08/31/2019 13:55:00	43	40	46	41	42	88	25	1
101	1618519	08/31/2019 13:56:00	45	42	46	43	43	98	25	0
101	1618519	08/31/2019 13:57:00	41	37	47	40	43	96	25	0
101	1618519	08/31/2019 13:58:00	39	34	41	38	39	100	25	0
101	1618519	08/31/2019 13:59:00	42	37	47	40	41	100	25	0
101	1618519	08/31/2019 14:00:00	45	42	48	42	42	97	25	0
101	1618519	08/31/2019 14:01:00	44	41	48	41	41	94	25	0
101	1618519	08/31/2019 14:02:00	43	38	46	41	42	96	25	0
101	1618519	08/31/2019 14:03:00	45	41	48	42	42	93	25	0
101	1618519	08/31/2019 14:04:00	43	40	45	40	40	88	26	0
101	1618519	08/31/2019 14:05:00	41	37	46	39	41	93	26	0
101	1618519	08/31/2019 14:06:00	39	35	42	37	41	100	25	0
101	1618519	08/31/2019 14:07:00	39	36	40	39	41	99	26	0
101	1618519	08/31/2019 14:08:00	44	39	49	42	42	97	25	0
101	1618519	08/31/2019 14:09:00	42	39	47	39	39	95	25	0
101	1618519	08/31/2019 14:10:00	44	41	50	42	42	97	25	0
101	1618519	08/31/2019 14:11:00	45	41	51	42	42	95	25	0
101	1618519	08/31/2019 14:12:00	43	41	45	40	40	97	25	0
101	1618519	08/31/2019 14:13:00	42	40	45	40	40	96	25	0
101	1618519	08/31/2019 14:14:00	43	41	47	41	41	91	26	0
101	1618519	08/31/2019 14:15:00	45	39	48	42	43	88	25	0
101	1618519	08/31/2019 14:16:00	44	42	46	41	41	88	25	0
101	1618519	08/31/2019 14:17:00	41	38	43	40	43	96	25	0
101	1618519	08/31/2019 14:18:00	43	40	45	41	41	99	25	0
101	1618519	08/31/2019 14:19:00	42	39	45	40	42	98	25	0
101	1618519	08/31/2019 14:20:00	40	36	42	39	43	97	25	0
101	1618519	08/31/2019 14:21:00	40	37	46	40	43	98	26	0
101	1618519	08/31/2019 14:22:00	42	38	47	40	43	94	25	0
101	1618519	08/31/2019 14:23:00	43	41	45	40	40	99	25	0
101	1618519	08/31/2019 14:24:00	44	41	46	41	41	91	26	0
101	1618519	08/31/2019 14:25:00	40	37	46	39	43	83	26	0
101	1618519	08/31/2019 14:26:00	44	39	51	44	49	78	27	0
101	1618519	08/31/2019 14:27:00	48	44	52	46	45	82	26	0
101	1618519	08/31/2019 14:28:00	47	44	49	44	44	63	26	0
101	1618519	08/31/2019 14:29:00	44	39	50	41	41	87	26	0
101	1618519	08/31/2019 14:30:00	40	38	42	38	39	97	25	0
101	1618519	08/31/2019 14:31:00	42	39	45	41	42	92	26	0
101	1618519	08/31/2019 14:32:00	44	39	48	41	42	95	25	0
101	1618519	08/31/2019 14:33:00	42	40	47	40	39	100	25	0
101	1618519	08/31/2019 14:34:00	44	40	50	42	42	91	27	0
101	1618519	08/31/2019 14:35:00	45	40	50	43	42	85	25	0
101	1618519	08/31/2019 14:36:00	43	41	47	41	41	96	25	0
101	1618519	08/31/2019 14:37:00	45	39	51	42	42	93	25	0
101	1618519	08/31/2019 14:38:00	45	41	48	42	42	96	25	0
101	1618519	08/31/2019 14:39:00	45	41	49	42	42	100	25	0
101	1618519	08/31/2019 14:40:00	45	39	48	42	43	94	25	1
101	1618519	08/31/2019 14:41:00	44	42	48	43	44	98	27	0
101	1618519	08/31/2019 14:42:00	44	38	48	41	41	92	25	0
101	1618519	08/31/2019 14:43:00	44	41	48	42	42	93	25	0
101	1618519	08/31/2019 14:44:00	44	42	48	42	42	94	26	0
101	1618519	08/31/2019 14:45:00	45	41	50	43	43	80	25	0
101	1618519	08/31/2019 14:46:00	44	38	51	42	42	95	25	0
101	1618519	08/31/2019 14:47:00	42	37	47	40	40	96	25	0
101	1618519	08/31/2019 14:48:00	42	39	45	40	40	98	25	0
101	1618519	08/31/2019 14:49:00	44	39	50	41	41	95	25	0
101	1618519	08/31/2019 14:50:00	45	41	50	42	42	95	25	0
101	1618519	08/31/2019 14:51:00	45	42	47	42	42	90	25	0
101	1618519	08/31/2019 14:52:00	46	42	49	43	43	96	26	0
101	1618519	08/31/2019 14:53:00	43	39	48	41	41	95	26	0
101	1618519	08/31/2019 14:54:00	44	41	47	41	41	97	26	0
101	1618519	08/31/2019 14:55:00	44	42	47	41	41	73	26	0
101	1618519	08/31/2019 14:56:00	43	41	46	41	41	76	25	0
101	1618519	08/31/2019 14:57:00	42	39	47	40	39	98	25	0
101	1618519	08/31/2019 14:58:00	41	37	45	39	38	98	25	0
101	1618519	08/31/2019 14:59:00	43	37	47	41	40	91	25	0
101	1618519	08/31/2019 15:00:00	42	38	46	39	38	79	25	0
101	1618519	08/31/2019 15:01:00	44	42	47	41	41	92	25	0
101	1618519	08/31/2019 15:02:00	44	41	49	41	41	97	25	0
101	1618519	08/31/2019 15:03:00	46	41	54	44	44	96	25	0
101	1618519	08/31/2019 15:04:00	44	40	46	42	41	53	25	0
101	1618519	08/31/2019 15:05:00	45	40	49	43	42	68	25	0
101	1618519	08/31/2019 15:06:00	43	40	46	40	40	91	25	0
101	1618519	08/31/2019 15:07:00	41	38	47	39	40	98	25	0
101	1618519	08/31/2019 15:08:00	43	40	46	40	40	92	26	0
101	1618519	08/31/2019 15:09:00	44	41	49	42	42	96	25	0
101	1618519	08/31/2019 15:10:00	42	40	44	39	39	91	25	0
101	1618519	08/31/2019 15:11:00	42	40	46	40	39	92	25	0
101	1618519	08/31/2019 15:12:00	43	40	47	40	40	95	25	0
101	1618519	08/31/2019 15:13:00	43	42	45	41	41	95	25	0
101	1618519	08/31/2019 15:14:00	43	40	45	40	40	98	26	0
101	1618519	08/31/2019 15:15:00	42	40	44	39	39	87	26	0
101	1618519	08/31/2019 15:16:00	42	40	44	39	39	88	25	0
101	1618519	08/31/2019 15:17:00	43	41	45	41	41	96	25	0
101	1618519	08/31/2019 15:18:00	46	42	50	43	43	95	24	0
101	1618519	08/31/2019 15:19:00	44	41	48	42	43	97	25	0
101	1618519	08/31/2019 15:20:00	41	39	45	41	45	100	26	0
101	1618519	08/31/2019 15:21:00	45	42	48	44	46	100	25	0
101	1618519	08/31/2019 15:22:00	46	41	49	43	43	98	25	0
101	1618519	08/31/2019 15:23:00	45	41	49	43	42	97	27	0
101	1618519	08/31/2019 15:24:00	47	42	56	45	43	97	26	0
101	1618519	08/31/2019 15:25:00	48	43	50	46	42	91	27	0
101	1618519	08/31/2019 15:26:00	45	42	46	43	43	68	56	0
101	1618519	08/31/2019 15:27:00	49	46	50	46	46	4	76	0
101	1618519	08/31/2019 15:28:00	255	255	255	255	255	0	76	255
103	1620145	09/15/2019 10:05:00	70	59	72	67	68	22	41	13
103	1620145	09/15/2019 10:06:00	67	52	78	66	67	54	39	9
103	1620145	09/15/2019 10:07:00	45	31	64	45	51	69	36	11
103	1620145	09/15/2019 10:08:00	48	32	54	48	54	79	48	12
103	1620145	09/15/2019 10:09:00	54	44	75	54	59	53	46	2
103	1620145	09/15/2019 10:10:00	37	27	51	37	42	51	42	12
103	1620145	09/15/2019 10:11:00	30	22	40	30	38	62	39	12
103	1620145	09/15/2019 10:12:00	10	5	21	10	12	83	32	75
103	1620145	09/15/2019 10:13:00	9	3	12	9	11	90	28	79
103	1620145	09/15/2019 10:14:00	8	2	12	8	10	100	28	81
103	1620145	09/15/2019 10:15:00	8	5	13	8	10	92	30	81
103	1620145	09/15/2019 10:16:00	11	6	15	11	14	79	31	73
103	1620145	09/15/2019 10:17:00	13	10	14	13	15	89	30	70
103	1620145	09/15/2019 10:18:00	13	11	17	13	16	97	30	68
103	1620145	09/15/2019 10:19:00	21	17	25	21	25	91	29	51
103	1620145	09/15/2019 10:20:00	16	11	22	16	20	70	30	61
103	1620145	09/15/2019 10:21:00	22	12	32	22	26	51	29	47
103	1620145	09/15/2019 10:22:00	27	24	32	27	32	60	29	34
103	1620145	09/15/2019 10:23:00	17	12	26	17	21	56	29	59
103	1620145	09/15/2019 10:24:00	11	10	13	11	13	41	28	73
103	1620145	09/15/2019 10:25:00	255	255	255	255	255	5	31	255
103	1620145	09/15/2019 10:26:00	255	255	255	255	255	7	34	255
103	1620145	09/15/2019 10:27:00	31	25	34	31	37	26	35	19
103	1620145	09/15/2019 10:28:00	27	25	28	27	33	43	34	7
103	1620145	09/15/2019 10:29:00	30	28	35	30	37	43	30	19
103	1620145	09/15/2019 10:30:00	29	26	32	29	35	43	32	28
103	1620145	09/15/2019 10:31:00	30	26	38	30	38	89	32	16
103	1620145	09/15/2019 10:32:00	21	8	29	21	26	88	30	49
103	1620145	09/15/2019 10:33:00	12	8	18	12	14	85	30	72
103	1620145	09/15/2019 10:34:00	22	19	26	22	27	92	28	46
103	1620145	09/15/2019 10:35:00	20	16	27	20	24	73	30	52
103	1620145	09/15/2019 10:36:00	20	16	27	20	24	81	30	52
103	1620145	09/15/2019 10:37:00	13	7	16	13	15	97	28	69
103	1620145	09/15/2019 10:38:00	14	7	23	14	17	91	31	66
103	1620145	09/15/2019 10:39:00	22	19	26	22	26	96	30	50
103	1620145	09/15/2019 10:40:00	29	23	33	28	33	98	29	39
103	1620145	09/15/2019 10:41:00	24	22	26	24	29	91	28	43
103	1620145	09/15/2019 10:42:00	31	26	39	30	31	37	30	17
103	1620145	09/15/2019 10:43:00	23	17	31	22	20	83	34	7
103	1620145	09/15/2019 10:44:00	23	19	33	21	16	29	43	5
103	1620145	09/15/2019 10:45:00	27	25	27	24	17	18	34	0
103	1620145	09/15/2019 10:46:00	27	26	29	25	18	18	35	0
103	1620145	09/15/2019 10:47:00	34	33	37	32	28	44	32	0
103	1620145	09/15/2019 10:48:00	33	31	35	30	26	65	31	0
103	1620145	09/15/2019 10:49:00	38	32	42	36	35	59	30	0
103	1620145	09/15/2019 10:50:00	39	36	42	37	36	64	30	1
103	1620145	09/15/2019 10:51:00	40	37	42	37	37	45	31	3
103	1620145	09/15/2019 10:52:00	35	29	39	34	37	77	30	16
103	1620145	09/15/2019 10:53:00	22	18	30	22	26	98	30	49
103	1620145	09/15/2019 10:54:00	18	14	21	18	21	98	30	57
103	1620145	09/15/2019 10:55:00	15	11	19	15	18	100	31	64
103	1620145	09/15/2019 10:56:00	15	11	19	15	18	82	31	64
103	1620145	09/15/2019 10:57:00	9	7	12	9	11	97	30	78
103	1620145	09/15/2019 10:58:00	9	7	16	9	11	99	33	78
103	1620145	09/15/2019 10:59:00	20	16	29	20	23	97	31	55
103	1620145	09/15/2019 11:00:00	13	9	16	13	15	95	31	70
103	1620145	09/15/2019 11:01:00	7	6	9	7	8	75	32	84
103	1620145	09/15/2019 11:02:00	6	6	7	6	8	85	32	85
103	1620145	09/15/2019 11:03:00	7	4	11	7	8	84	33	84
103	1620145	09/15/2019 11:04:00	12	10	14	12	14	95	32	72
103	1620145	09/15/2019 11:05:00	12	9	21	12	14	57	32	71
103	1620145	09/15/2019 11:06:00	23	22	31	23	27	22	32	45
103	1620145	09/15/2019 11:07:00	19	11	44	19	22	71	32	58
103	1620145	09/15/2019 11:08:00	11	8	17	11	14	84	32	73
103	1620145	09/15/2019 11:09:00	27	16	49	27	31	100	35	48
103	1620145	09/15/2019 11:10:00	83	52	97	83	87	89	48	10
103	1620145	09/15/2019 11:11:00	85	82	88	88	88	79	47	0
103	1620145	09/15/2019 11:12:00	90	85	95	92	90	70	49	0
103	1620145	09/15/2019 11:13:00	86	83	91	91	91	59	46	0
103	1620145	09/15/2019 11:14:00	87	84	91	92	92	66	47	0
103	1620145	09/15/2019 11:15:00	86	84	89	90	90	69	48	0
103	1620145	09/15/2019 11:16:00	88	85	97	92	92	39	46	0
103	1620145	09/15/2019 11:17:00	89	85	97	93	92	62	47	0
103	1620145	09/15/2019 11:18:00	89	85	92	93	92	60	47	0
103	1620145	09/15/2019 11:19:00	86	84	89	88	88	80	46	0
103	1620145	09/15/2019 11:20:00	84	83	89	86	86	79	47	0
103	1620145	09/15/2019 11:21:00	88	84	93	92	91	67	47	0
103	1620145	09/15/2019 11:22:00	86	83	89	89	89	78	47	0
103	1620145	09/15/2019 11:23:00	88	86	91	89	90	81	47	0
103	1620145	09/15/2019 11:24:00	86	83	89	89	89	80	47	0
103	1620145	09/15/2019 11:25:00	89	84	92	92	92	84	47	0
103	1620145	09/15/2019 11:26:00	86	83	90	88	88	79	45	0
103	1620145	09/15/2019 11:27:00	86	84	89	89	89	82	47	0
104	1458207	10/07/2019 21:23:00	37	34	40	36	39	56	26	17
104	1458207	10/07/2019 21:24:00	30	28	34	30	36	99	25	34
104	1458207	10/07/2019 21:25:00	29	24	32	29	34	100	24	38
104	1458207	10/07/2019 21:26:00	29	25	32	29	35	100	24	37
104	1458207	10/07/2019 21:27:00	28	26	30	28	34	100	24	40
104	1458207	10/07/2019 21:28:00	31	27	33	31	37	100	24	38
104	1458207	10/07/2019 21:29:00	31	29	34	31	38	100	24	34
104	1458207	10/07/2019 21:30:00	34	30	38	34	42	100	24	20
104	1458207	10/07/2019 21:31:00	36	33	39	36	41	100	24	24
104	1458207	10/07/2019 21:32:00	37	33	40	37	40	100	24	21
104	1458207	10/07/2019 21:33:00	40	35	43	40	43	81	24	13
104	1458207	10/07/2019 21:34:00	39	34	44	39	45	95	24	9
104	1458207	10/07/2019 21:35:00	44	32	48	44	47	99	27	14
104	1458207	10/07/2019 21:36:00	45	41	47	45	47	96	27	5
104	1458207	10/07/2019 21:37:00	47	38	54	47	49	79	36	3
104	1458207	10/07/2019 21:38:00	49	42	55	48	48	76	27	1
104	1458207	10/07/2019 21:39:00	50	47	55	48	48	81	28	2
104	1458207	10/07/2019 21:40:00	43	35	51	43	49	75	26	9
104	1458207	10/07/2019 21:41:00	44	42	51	44	53	95	27	7
104	1458207	10/07/2019 21:42:00	45	40	52	44	47	81	26	12
104	1458207	10/07/2019 21:43:00	47	42	51	46	47	84	28	3
104	1458207	10/07/2019 21:44:00	44	38	48	44	46	80	26	1
104	1458207	10/07/2019 21:45:00	38	35	42	38	44	82	26	0
104	1458207	10/07/2019 21:46:00	40	38	41	40	46	68	27	0
104	1458207	10/07/2019 21:47:00	43	41	51	43	48	21	27	0
104	1458207	10/07/2019 21:48:00	48	43	48	45	45	29	25	0
104	1458207	10/07/2019 21:49:00	52	47	66	51	55	22	26	2
104	1458207	10/07/2019 21:50:00	47	40	51	46	47	31	26	1
104	1458207	10/07/2019 21:51:00	255	255	255	255	255	13	29	255
104	1458207	10/07/2019 21:52:00	255	255	255	255	255	8	32	255
104	1458207	10/07/2019 21:53:00	45	42	52	45	50	14	30	1
104	1458207	10/07/2019 21:54:00	49	42	54	47	47	72	29	1
104	1458207	10/07/2019 21:55:00	53	46	66	51	51	36	30	0
104	1458207	10/07/2019 21:56:00	42	37	48	41	43	10	30	6
104	1458207	10/07/2019 21:57:00	47	36	66	45	46	69	30	9
104	1458207	10/07/2019 21:58:00	47	39	60	45	47	96	29	14
104	1458207	10/07/2019 21:59:00	43	34	49	43	45	97	31	14
104	1458207	10/07/2019 22:00:00	38	33	41	37	40	87	31	13
104	1458207	10/07/2019 22:01:00	40	33	46	38	39	80	33	4
104	1458207	10/07/2019 22:02:00	42	38	46	42	43	90	29	9
104	1458207	10/07/2019 22:03:00	42	39	48	41	42	92	30	10
104	1458207	10/07/2019 22:04:00	45	38	50	43	44	77	33	13
104	1458207	10/07/2019 22:05:00	42	36	68	42	46	95	34	22
104	1458207	10/07/2019 22:06:00	65	49	73	65	74	95	54	4
104	1458207	10/07/2019 22:07:00	69	49	82	71	77	87	49	0
104	1458207	10/07/2019 22:08:00	74	61	81	83	88	73	42	0
104	1458207	10/07/2019 22:09:00	60	53	65	77	80	78	38	0
104	1458207	10/07/2019 22:10:00	47	34	53	49	54	75	33	3
104	1458207	10/07/2019 22:11:00	31	28	34	31	38	93	26	12
104	1458207	10/07/2019 22:12:00	31	29	34	31	39	80	27	18
104	1458207	10/07/2019 22:13:00	36	25	46	36	42	70	27	10
104	1458207	10/07/2019 22:14:00	32	30	35	32	40	76	26	25
104	1458207	10/07/2019 22:15:00	35	32	41	35	41	94	25	26
104	1458207	10/07/2019 22:16:00	32	29	35	32	39	100	25	26
104	1458207	10/07/2019 22:17:00	32	30	34	32	39	100	25	20
104	1458207	10/07/2019 22:18:00	33	23	42	33	41	97	26	7
104	1458207	10/07/2019 22:19:00	34	30	42	34	42	96	26	11
104	1458207	10/07/2019 22:20:00	29	24	34	29	37	100	25	14
104	1458207	10/07/2019 22:21:00	32	27	35	32	39	100	25	11
104	1458207	10/07/2019 22:22:00	33	30	35	33	40	100	25	22
104	1458207	10/07/2019 22:23:00	32	28	35	32	40	97	26	18
104	1458207	10/07/2019 22:24:00	36	34	38	36	43	73	25	23
104	1458207	10/07/2019 22:25:00	36	33	39	36	41	62	26	19
104	1458207	10/07/2019 22:26:00	43	38	51	42	45	73	36	20
104	1458207	10/07/2019 22:27:00	54	50	59	56	59	61	49	2
104	1458207	10/07/2019 22:28:00	51	48	52	51	51	68	56	0
104	1458207	10/07/2019 22:29:00	65	45	88	65	65	85	60	0
104	1458207	10/07/2019 22:30:00	91	90	92	97	98	58	63	0
104	1458207	10/07/2019 22:31:00	90	84	92	96	97	79	65	0
104	1458207	10/07/2019 22:32:00	83	57	92	86	89	81	47	1
104	1458207	10/07/2019 22:33:00	39	33	57	37	39	85	25	5
104	1458207	10/07/2019 22:34:00	29	16	38	28	35	76	27	8
104	1458207	10/07/2019 22:35:00	22	17	30	22	31	98	26	11
104	1458207	10/07/2019 22:36:00	27	22	29	27	33	100	24	34
104	1458207	10/07/2019 22:37:00	29	23	40	29	34	99	26	28
104	1458207	10/07/2019 22:38:00	33	27	43	33	37	98	25	30
104	1458207	10/07/2019 22:39:00	34	30	38	34	39	100	26	30
104	1458207	10/07/2019 22:40:00	30	29	33	30	37	100	25	33
104	1458207	10/07/2019 22:41:00	28	25	31	28	33	100	24	38
104	1458207	10/07/2019 22:42:00	25	19	32	25	33	99	25	25
104	1458207	10/07/2019 22:43:00	26	21	29	26	33	89	25	29
104	1458207	10/07/2019 22:44:00	28	27	30	28	35	84	26	31
104	1458207	10/07/2019 22:45:00	30	27	31	30	36	98	26	32
104	1458207	10/07/2019 22:46:00	30	24	33	30	37	100	25	23
104	1458207	10/07/2019 22:47:00	29	25	32	29	36	100	24	28
104	1458207	10/07/2019 22:48:00	30	29	32	30	36	100	24	35
104	1458207	10/07/2019 22:49:00	30	28	32	30	37	100	24	31
104	1458207	10/07/2019 22:50:00	30	28	34	30	37	100	25	30
104	1458207	10/07/2019 22:51:00	32	30	34	32	39	98	25	28
104	1458207	10/07/2019 22:52:00	30	28	33	30	37	100	24	31
104	1458207	10/07/2019 22:53:00	29	25	32	29	35	100	24	36
104	1458207	10/07/2019 22:54:00	26	24	28	26	31	87	25	42
104	1458207	10/07/2019 22:55:00	28	26	33	28	35	96	26	31
104	1458207	10/07/2019 22:56:00	28	27	30	28	36	100	24	29
104	1458207	10/07/2019 22:57:00	29	27	32	29	34	100	24	37
104	1458207	10/07/2019 22:58:00	31	28	34	31	38	100	24	26
104	1458207	10/07/2019 22:59:00	34	31	36	34	42	100	24	21
104	1458207	10/07/2019 23:00:00	33	31	35	33	39	100	24	20
104	1458207	10/07/2019 23:01:00	32	30	33	32	39	100	24	21
104	1458207	10/07/2019 23:02:00	31	30	32	31	38	100	24	24
104	1458207	10/07/2019 23:03:00	33	27	38	33	41	100	26	17
104	1458207	10/07/2019 23:04:00	33	30	36	33	41	85	26	9
104	1458207	10/07/2019 23:05:00	32	28	38	32	39	88	25	11
104	1458207	10/07/2019 23:06:00	32	26	35	32	41	95	26	12
104	1458207	10/07/2019 23:07:00	32	31	33	32	40	74	30	21
104	1458207	10/07/2019 23:08:00	36	32	39	36	40	22	31	20
104	1458207	10/07/2019 23:09:00	38	34	40	37	43	73	25	11
104	1458207	10/07/2019 23:10:00	31	27	38	31	40	93	24	10
104	1458207	10/07/2019 23:11:00	30	26	37	30	39	97	26	12
104	1458207	10/07/2019 23:12:00	34	29	40	34	40	96	25	11
104	1458207	10/07/2019 23:13:00	32	30	39	32	40	100	25	17
104	1458207	10/07/2019 23:14:00	31	28	37	31	38	90	26	16
104	1458207	10/07/2019 23:15:00	35	31	37	35	38	82	24	17
104	1458207	10/07/2019 23:16:00	33	30	36	33	37	100	25	16
104	1458207	10/07/2019 23:17:00	33	31	34	33	36	100	25	19
104	1458207	10/07/2019 23:18:00	32	29	34	32	40	100	25	20
104	1458207	10/07/2019 23:19:00	30	26	33	30	38	100	25	12
104	1458207	10/07/2019 23:20:00	30	27	33	30	39	100	24	13
104	1458207	10/07/2019 23:21:00	34	33	37	34	42	98	24	17
104	1458207	10/07/2019 23:22:00	35	33	37	35	40	48	29	19
104	1458207	10/07/2019 23:23:00	35	33	38	35	42	38	28	16
104	1458207	10/07/2019 23:24:00	34	30	38	34	40	82	25	13
104	1458207	10/07/2019 23:25:00	32	30	35	32	38	85	24	15
104	1458207	10/07/2019 23:26:00	36	33	41	36	42	99	25	18
104	1458207	10/07/2019 23:27:00	34	28	39	33	40	54	25	11
104	1458207	10/07/2019 23:28:00	33	30	37	33	41	79	25	14
104	1458207	10/07/2019 23:29:00	31	22	35	31	39	99	27	16
104	1458207	10/07/2019 23:30:00	27	22	35	27	36	82	29	9
104	1458207	10/07/2019 23:31:00	30	23	35	30	38	94	25	16
104	1458207	10/07/2019 23:32:00	31	30	33	31	38	100	24	30
104	1458207	10/07/2019 23:33:00	31	30	34	31	39	100	25	24
104	1458207	10/07/2019 23:34:00	28	26	30	28	34	96	25	34
104	1458207	10/07/2019 23:35:00	32	28	34	32	39	87	25	26
104	1458207	10/07/2019 23:36:00	29	27	32	29	37	100	25	23
104	1458207	10/07/2019 23:37:00	30	29	32	30	37	100	25	30
104	1458207	10/07/2019 23:38:00	31	28	35	31	38	100	25	26
104	1458207	10/07/2019 23:39:00	29	26	32	29	36	100	25	31
104	1458207	10/07/2019 23:40:00	28	26	30	28	34	99	25	35
104	1458207	10/07/2019 23:41:00	31	25	34	30	38	98	25	23
104	1458207	10/07/2019 23:42:00	34	32	36	34	41	79	25	27
104	1458207	10/07/2019 23:43:00	35	31	37	35	43	98	25	25
104	1458207	10/07/2019 23:44:00	32	30	34	32	39	98	26	23
104	1458207	10/07/2019 23:45:00	30	28	33	30	37	84	26	32
104	1458207	10/07/2019 23:46:00	32	30	36	32	38	100	25	28
104	1458207	10/07/2019 23:47:00	36	33	38	36	41	98	25	25
104	1458207	10/07/2019 23:48:00	31	29	35	31	38	89	26	23
104	1458207	10/07/2019 23:49:00	34	31	38	34	40	87	25	26
104	1458207	10/07/2019 23:50:00	35	32	39	35	43	99	25	13
104	1458207	10/07/2019 23:51:00	36	33	40	36	45	97	25	9
104	1458207	10/07/2019 23:52:00	35	31	39	35	42	95	25	8
104	1458207	10/07/2019 23:53:00	40	35	44	40	43	88	25	10
104	1458207	10/07/2019 23:54:00	36	32	43	36	42	100	25	10
104	1458207	10/07/2019 23:55:00	36	33	41	36	44	84	25	13
104	1458207	10/07/2019 23:56:00	36	31	42	35	42	99	25	9
104	1458207	10/07/2019 23:57:00	37	32	42	37	41	100	25	9
104	1458207	10/07/2019 23:58:00	36	33	38	36	39	99	25	6
104	1458207	10/07/2019 23:59:00	35	30	42	34	38	97	25	6
104	1458207	10/08/2019 00:00:00	39	34	41	38	44	89	25	2
104	1458207	10/08/2019 00:01:00	42	37	47	41	43	97	25	4
104	1458207	10/08/2019 00:02:00	40	36	45	40	44	98	25	14
104	1458207	10/08/2019 00:03:00	33	30	36	33	39	98	25	26
104	1458207	10/08/2019 00:04:00	28	27	30	28	35	95	41	33
104	1458207	10/08/2019 00:05:00	26	17	30	26	34	26	70	22
105	790644	10/09/2019 12:11:00	46	46	47	46	55	7	28	0
105	790644	10/09/2019 12:12:00	52	43	62	51	55	71	28	0
105	790644	10/09/2019 12:13:00	54	46	64	53	59	87	27	1
105	790644	10/09/2019 12:14:00	51	44	57	51	55	99	28	1
105	790644	10/09/2019 12:15:00	56	47	69	55	61	79	32	0
105	790644	10/09/2019 12:16:00	54	44	63	53	55	81	30	0
105	790644	10/09/2019 12:17:00	47	39	64	47	53	74	29	0
105	790644	10/09/2019 12:18:00	50	38	62	50	55	92	28	3
105	790644	10/09/2019 12:19:00	59	52	66	57	60	98	27	2
105	790644	10/09/2019 12:20:00	63	54	70	61	61	90	30	0
105	790644	10/09/2019 12:21:00	62	55	69	60	60	77	28	0
105	790644	10/09/2019 12:22:00	63	55	71	60	61	73	30	1
105	790644	10/09/2019 12:23:00	57	50	62	54	55	79	29	0
105	790644	10/09/2019 12:24:00	61	52	71	60	64	92	30	1
105	790644	10/09/2019 12:25:00	61	54	70	60	65	87	28	1
105	790644	10/09/2019 12:26:00	59	52	69	57	61	97	27	1
105	790644	10/09/2019 12:27:00	64	56	70	64	69	90	34	0
105	790644	10/09/2019 12:28:00	57	40	68	57	64	32	32	0
105	790644	10/09/2019 12:29:00	41	40	44	41	61	79	29	0
105	790644	10/09/2019 12:30:00	44	42	45	44	58	100	27	0
105	790644	10/09/2019 12:31:00	63	46	79	64	73	91	34	0
105	790644	10/09/2019 12:32:00	81	78	87	82	82	39	37	0
105	790644	10/09/2019 12:33:00	84	75	93	84	85	61	42	0
105	790644	10/09/2019 12:34:00	84	75	91	88	89	79	40	0
105	790644	10/09/2019 12:35:00	81	75	86	83	84	83	46	0
105	790644	10/09/2019 12:36:00	75	70	82	75	75	18	50	0
105	790644	10/09/2019 12:43:00	66	61	68	86	91	14	44	0
105	790644	10/09/2019 12:44:00	59	51	65	78	84	39	45	0
105	790644	10/09/2019 12:45:00	255	255	255	255	255	6	39	255
105	790644	10/09/2019 12:46:00	92	90	94	92	91	40	44	0
105	790644	10/09/2019 12:47:00	85	74	90	85	85	60	44	0
105	790644	10/09/2019 12:48:00	82	64	88	82	80	63	42	0
105	790644	10/09/2019 12:49:00	66	62	72	66	66	64	37	0
105	790644	10/09/2019 12:50:00	75	65	86	75	80	62	39	0
105	790644	10/09/2019 12:51:00	86	86	87	86	83	21	25	0
105	790644	10/09/2019 12:52:00	255	255	255	255	255	0	29	255
105	790644	10/09/2019 12:53:00	95	93	97	96	94	21	61	0
105	790644	10/09/2019 12:54:00	90	85	97	93	94	51	54	0
105	790644	10/09/2019 12:55:00	83	76	88	84	84	59	50	0
105	790644	10/09/2019 12:56:00	90	79	92	90	90	58	50	0
105	790644	10/09/2019 12:57:00	89	85	94	91	90	52	50	0
105	790644	10/09/2019 12:58:00	86	76	91	89	88	30	52	0
105	790644	10/09/2019 12:59:00	86	83	91	90	90	62	44	0
105	790644	10/09/2019 13:00:00	84	78	89	86	86	84	37	0
105	790644	10/09/2019 13:01:00	78	69	83	78	78	86	39	0
105	790644	10/09/2019 13:02:00	81	75	85	80	80	71	39	0
105	790644	10/09/2019 13:03:00	79	73	86	78	78	78	37	0
105	790644	10/09/2019 13:04:00	75	57	90	75	75	92	36	0
105	790644	10/09/2019 13:05:00	66	62	76	66	73	89	38	0
105	790644	10/09/2019 13:06:00	63	54	73	63	67	57	49	0
105	790644	10/09/2019 13:07:00	75	70	87	75	81	23	46	0
105	790644	10/09/2019 13:09:00	95	93	97	96	97	21	54	0
105	790644	10/09/2019 13:10:00	94	90	97	97	97	57	54	0
105	790644	10/09/2019 13:11:00	92	87	95	94	97	33	57	0
105	790644	10/09/2019 13:12:00	92	91	94	93	95	41	57	0
105	790644	10/09/2019 13:13:00	90	87	95	94	97	43	58	0
105	790644	10/09/2019 13:14:00	93	90	95	97	97	63	52	0
105	790644	10/09/2019 13:15:00	93	90	96	96	97	59	51	0
105	790644	10/09/2019 13:16:00	90	87	94	95	97	43	55	0
105	790644	10/09/2019 13:17:00	92	91	93	97	97	53	58	0
105	790644	10/09/2019 13:18:00	90	87	93	95	97	53	55	0
105	790644	10/09/2019 13:19:00	87	84	91	91	91	61	45	0
105	790644	10/09/2019 13:20:00	89	86	92	93	93	61	46	0
105	790644	10/09/2019 13:21:00	88	82	92	92	92	74	48	0
105	790644	10/09/2019 13:22:00	86	81	91	90	91	55	49	0
105	790644	10/09/2019 13:23:00	91	84	96	96	97	47	55	0
105	790644	10/09/2019 13:24:00	93	90	97	96	96	52	48	0
105	790644	10/09/2019 13:25:00	93	91	95	94	93	58	46	0
105	790644	10/09/2019 13:26:00	91	89	93	92	92	31	46	0
105	790644	10/09/2019 13:27:00	90	89	91	91	91	49	45	0
105	790644	10/09/2019 13:28:00	87	84	91	86	86	52	55	0
105	790644	10/09/2019 13:29:00	75	58	84	74	75	17	49	2
105	790644	10/09/2019 13:30:00	83	61	95	83	83	34	45	0
105	790644	10/09/2019 13:31:00	87	70	95	89	89	66	48	0
105	790644	10/09/2019 13:32:00	93	92	95	94	94	64	53	0
105	790644	10/09/2019 13:33:00	89	84	94	90	90	20	54	0
105	790644	10/09/2019 13:34:00	94	91	97	95	96	37	51	0
105	790644	10/09/2019 13:35:00	93	88	96	94	94	28	49	0
105	790644	10/09/2019 13:36:00	91	87	96	91	92	51	51	0
105	790644	10/09/2019 13:37:00	93	89	95	94	94	51	50	0
105	790644	10/09/2019 13:38:00	90	85	94	90	91	52	46	0
111	1626509	11/07/2019 02:39:00	43	35	57	42	44	92	33	25
111	1626509	11/07/2019 02:40:00	31	19	38	30	33	97	28	38
111	1626509	11/07/2019 02:41:00	18	15	20	18	21	96	27	58
111	1626509	11/07/2019 02:42:00	16	14	19	16	20	97	27	61
111	1626509	11/07/2019 02:43:00	17	14	19	17	20	99	25	60
111	1626509	11/07/2019 02:44:00	13	11	15	13	16	99	25	68
111	1626509	11/07/2019 02:45:00	16	14	18	16	19	98	27	61
111	1626509	11/07/2019 02:46:00	19	17	22	19	23	98	26	55
111	1626509	11/07/2019 02:47:00	23	21	26	23	28	97	27	45
111	1626509	11/07/2019 02:48:00	22	17	29	22	26	82	29	49
111	1626509	11/07/2019 02:49:00	16	11	22	16	19	94	26	61
111	1626509	11/07/2019 02:50:00	12	10	13	12	14	100	26	72
111	1626509	11/07/2019 02:51:00	17	12	25	17	21	100	26	59
111	1626509	11/07/2019 02:52:00	33	25	43	32	36	100	25	35
111	1626509	11/07/2019 02:53:00	44	39	48	42	44	79	31	20
111	1626509	11/07/2019 02:54:00	45	42	50	43	43	47	27	10
111	1626509	11/07/2019 02:55:00	46	42	50	44	44	82	28	11
111	1626509	11/07/2019 02:56:00	43	40	48	41	42	100	27	12
111	1626509	11/07/2019 02:57:00	41	40	43	39	39	89	26	12
111	1626509	11/07/2019 02:58:00	40	34	45	38	39	59	28	13
111	1626509	11/07/2019 02:59:00	41	39	43	39	39	94	26	7
111	1626509	11/07/2019 03:00:00	41	36	46	39	40	87	27	12
111	1626509	11/07/2019 03:01:00	43	36	49	43	46	94	27	17
111	1626509	11/07/2019 03:02:00	41	38	46	39	41	100	26	23
111	1626509	11/07/2019 03:03:00	2	27	43	39	40	99	25	19
111	1626509	11/07/2019 03:04:00	34	24	39	34	37	64	26	31
111	1626509	11/07/2019 03:05:00	34	23	44	33	36	79	25	34
111	1626509	11/07/2019 03:06:00	38	36	42	37	39	100	26	26
111	1626509	11/07/2019 03:07:00	38	36	42	37	40	100	26	28
111	1626509	11/07/2019 03:08:00	2	27	44	41	44	81	27	26
111	1626509	11/07/2019 03:09:00	36	33	39	36	39	85	25	30
111	1626509	11/07/2019 03:10:00	36	33	39	35	39	95	26	31
111	1626509	11/07/2019 03:11:00	36	33	44	36	43	53	26	22
111	1626509	11/07/2019 03:12:00	43	42	44	40	40	54	26	6
111	1626509	11/07/2019 03:13:00	2	27	46	42	42	35	26	9
111	1626509	11/07/2019 03:14:00	41	32	44	39	42	43	26	16
111	1626509	11/07/2019 03:15:00	34	31	38	34	38	22	27	18
111	1626509	11/07/2019 03:16:00	44	38	50	43	46	32	27	5
111	1626509	11/07/2019 03:17:00	33	21	52	33	40	39	27	14
111	1626509	11/07/2019 03:18:00	30	24	42	30	37	87	27	14
111	1626509	11/07/2019 03:19:00	41	39	44	39	41	85	25	19
111	1626509	11/07/2019 03:20:00	39	32	46	38	41	59	27	27
111	1626509	11/07/2019 03:21:00	28	22	36	28	33	46	30	35
111	1626509	11/07/2019 03:22:00	33	31	34	33	38	82	25	24
111	1626509	11/07/2019 03:23:00	37	32	40	36	39	100	26	29
111	1626509	11/07/2019 03:24:00	38	33	41	37	40	58	25	23
111	1626509	11/07/2019 03:25:00	41	39	45	40	42	76	25	22
111	1626509	11/07/2019 03:26:00	38	35	40	36	39	85	25	29
111	1626509	11/07/2019 03:27:00	37	33	41	36	40	93	25	30
111	1626509	11/07/2019 03:28:00	2	27	43	38	40	83	26	23
111	1626509	11/07/2019 03:29:00	42	36	49	44	46	66	36	22
111	1626509	11/07/2019 03:30:00	53	46	59	56	57	91	33	8
111	1626509	11/07/2019 03:31:00	58	52	64	58	59	82	29	3
111	1626509	11/07/2019 03:32:00	47	42	55	46	47	88	31	17
111	1626509	11/07/2019 03:33:00	43	39	48	43	47	96	29	22
111	1626509	11/07/2019 03:34:00	41	36	46	40	43	98	25	20
111	1626509	11/07/2019 03:35:00	34	29	38	33	37	100	25	34
111	1626509	11/07/2019 03:36:00	36	30	41	35	39	90	25	32
111	1626509	11/07/2019 03:37:00	34	31	38	34	38	94	26	34
111	1626509	11/07/2019 03:38:00	39	36	42	39	44	98	27	26
111	1626509	11/07/2019 03:39:00	37	34	39	37	41	84	26	33
111	1626509	11/07/2019 03:40:00	37	32	39	36	39	100	25	31
111	1626509	11/07/2019 03:41:00	37	33	40	37	40	100	25	28
111	1626509	11/07/2019 03:42:00	38	37	40	37	40	100	26	25
111	1626509	11/07/2019 03:43:00	47	40	51	48	51	95	33	14
111	1626509	11/07/2019 03:44:00	51	49	54	56	64	93	31	6
111	1626509	11/07/2019 03:45:00	47	40	50	47	54	99	25	17
111	1626509	11/07/2019 03:46:00	43	37	49	43	50	98	29	23
111	1626509	11/07/2019 03:47:00	32	31	37	32	40	95	27	25
111	1626509	11/07/2019 03:48:00	33	30	38	33	39	99	26	31
111	1626509	11/07/2019 03:49:00	37	34	41	37	40	84	26	30
111	1626509	11/07/2019 03:50:00	37	35	39	37	40	99	25	28
111	1626509	11/07/2019 03:51:00	39	36	46	38	41	99	25	21
111	1626509	11/07/2019 03:52:00	39	34	46	39	43	97	25	26
111	1626509	11/07/2019 03:53:00	37	32	40	37	41	100	26	27
111	1626509	11/07/2019 03:54:00	37	32	41	37	42	100	26	25
111	1626509	11/07/2019 03:55:00	42	38	46	42	44	76	25	26
111	1626509	11/07/2019 03:56:00	39	32	47	38	42	91	25	21
111	1626509	11/07/2019 03:57:00	41	31	48	40	44	100	25	14
111	1626509	11/07/2019 03:58:00	39	33	46	39	43	100	25	28
[truncated: 9,577 more rows]

## Sheet: bis_AVG
Pt.No	AVGBIS_20min_N	AVGBIS_20minAVG	MINBIS_20min_N	MINBIS_20minAVG	MAXBIS_20min_N	MAXBIS_20minAVG	AVGBISAL_20min_N	AVGBISAL_20minAVG	AVGBISA2_20min_N	AVGBISA2_20minAVG	AVGSQI_20min_N	AVGSQI_20minAVG	AVGEMG_20min_N	AVGEMG_20minAVG	AVGSR_20min_N	AVGSR_20minAVG	AVGBIS_30min_N	AVGBIS_30minAVG	MINBIS_30min_N	MINBIS_30minAVG	MAXBIS_30min_N	MAXBIS_30minAVG	AVGBISAL_30min_N	AVGBISAL_30minAVG	AVGBISA2_30min_N	AVGBISA2_30minAVG	AVGSQI_30min_N	AVGSQI_30minAVG	AVGEMG_30min_N	AVGEMG_30minAVG	AVGSR_30min_N	AVGSR_30minAVG
23	21	37.2381	21	32.1905	21	46.1905	21	53.2381	21	53.1905	21	61.619	21	33.9524	21	0	31	42.1935	31	37.0323	31	50.8387	31	52.3871	31	52.1935	31	70.7419	31	32.0323	31	0
25	21	47.5238	21	42.381	21	53.2857	21	45.5714	21	42.8571	21	79.7143	21	30.7619	21	0	31	46.4516	31	42.2581	31	51.2581	31	44.3871	31	42.5161	31	71.6452	31	29.9677	31	0
29	21	56.5238	21	50.2857	21	63.5238	21	54.4762	21	55.4286	21	95.381	21	27.1429	21	5.80952	31	53.7097	31	47.6452	31	60.3871	31	52.0645	31	54.3548	31	93.6129	31	26.9677	31	9.96774
51	21	39.1905	21	34.0476	21	44.7619	21	38.7619	21	45.8095	21	69.7619	21	26.1905	21	1.47619	31	38	31	33.3226	31	43.0323	31	37.6774	31	45.129	31	75.8387	31	26.1935	31	1.48387
57	21	12.381	21	7.09524	21	18.2857	21	12.381	21	14.5714	21	91.8095	21	27.8095	21	71	27	13.1481	27	7.96296	27	18.7407	27	13.1111	27	15.5185	27	87.7778	27	27.3704	27	69.1111
63	21	46.9524	21	40.8095	21	54.6667	21	46	21	49.1429	21	79.381	21	31.0952	21	1.47619	31	46.5806	31	40.5161	31	55.129	31	45.5484	31	49.129	31	83.7742	31	29.8065	31	2.70968
67	21	14	21	8.71429	21	19.8095	21	13.8571	21	15.7619	21	92.9524	21	28.1429	21	66.4762	31	18.6452	31	12.6774	31	24.8065	31	18.2903	31	20.3548	31	91.6129	31	29.5806	31	54.129
68	21	43.1429	21	36.7619	21	49.5238	21	43.1429	21	50.6667	21	74	21	28.4762	21	3.85714	30	43.4667	30	37.7667	30	48.9667	30	43.5	30	51.7333	30	63.2333	30	30.0333	30	4.1
69	21	13	21	7.85714	21	18.9524	21	12.9524	21	15.2381	21	88	21	31.0476	21	70.1429	31	12.6129	31	7.83871	31	18.3871	31	12.5806	31	15	31	81.1613	31	30.2903	31	69.871
71	21	45.8571	21	41.8571	21	49.4286	21	46.8571	21	52.3333	21	80.2857	21	29.0952	21	11.2381	31	46.9677	31	43.1935	31	50.2581	31	47.6774	31	52.4516	31	78.871	31	29.0323	31	7.83871
72	21	37.3333	21	31.8095	21	44.0476	21	36.2381	21	40.0476	21	66.7143	21	27.8571	21	0.190476	31	39.1613	31	34.0968	31	45.4194	31	37.9677	31	40.9355	31	59.1935	31	27.871	31	0.129032
74	21	45.2857	21	41.3333	21	49.8571	21	45.0952	21	49.0476	21	91.5714	21	26.8095	21	13.5714	31	42.0323	31	37.3871	31	47.2258	31	41.9032	31	45.4839	31	80.129	31	26.5484	31	17.2581
80	21	41.619	21	36.2381	21	47.9048	21	40.9048	21	47.0476	21	84.3333	21	25.1905	21	2.09524	30	42.5667	30	37.4333	30	48.1667	30	41.6333	30	46.9667	30	75.2	30	25.3667	30	1.8
82	21	39	21	33.5714	21	45.3333	21	38.8095	21	45.7143	21	84.7619	21	30.1429	21	2.66667	31	36.6129	31	31.3226	31	42.4194	31	36.2581	31	42.7419	31	88.5161	31	29.4194	31	3.90323
89	21	23	21	17.6667	21	29.7143	21	23	21	26.5714	21	91.9048	21	27.1429	21	50.2381	31	23.6774	31	18.8065	31	29.7419	31	23.6774	31	27.3226	31	91.6129	31	26.6129	31	48.2258
92	21	7.47619	21	4.52381	21	10.3333	21	7.47619	21	8.95238	21	91.619	21	28.0952	21	82.4286	26	10.1154	26	6.69231	26	13.5	26	10.0385	26	11.9231	26	93.0769	26	28.0769	26	76.6923
93	21	8.28571	21	5.2381	21	13.4762	21	8.28571	21	9.90476	21	73.1905	21	30.4762	21	80.5714	31	7	31	4	31	11.9032	31	7	31	8.41935	31	74.9032	31	30.2258	31	83.5484
94	21	28.2857	21	22.619	21	42.5238	21	34.0476	21	38.4762	21	83	21	31.8571	21	34.1905	31	25.871	31	20.2581	31	37.2581	31	29.7742	31	33.6452	31	87.1613	31	30.871	31	41.9032
101	21	37.8095	21	33.0952	21	43.3333	21	36.9048	21	42.9048	21	89.8571	21	25.7143	21	0.190476	31	37.9355	31	33.1613	31	43.1613	31	36.9677	31	42.2258	31	87.2903	31	25.7419	31	0.16129
103	20	26.85	20	19.75	20	34.4	20	26.65	20	30.2	20	69.45	20	33.7	20	46.15	29	26.1724	29	19.8621	29	32.931	29	26.0345	29	30.1724	29	67.9655	29	32.931	29	42.4483
104	21	38.8095	21	34.1429	21	43	21	38.5238	21	42.8095	21	90.3333	21	25.8571	21	18.1429	29	40.4138	29	35.8966	29	44.8966	29	40.0345	29	44.1379	29	77.3793	29	26.069	29	13.3103
105	21	55.4286	21	47.381	21	63.9048	21	54.5238	21	60	21	79.7619	21	29.2857	21	0.52381	26	60.3462	26	52.6154	26	68.5	26	59.8846	26	64.4231	26	75.1923	26	31.9231	26	0.423077
111	21	28.381	21	24.3333	21	33	21	27.5714	21	30	21	90.4286	21	27.1429	21	39.619	31	29.1935	31	26.6774	31	36.3548	31	30.871	31	33.2903	31	89.9355	31	26.7742	31	34.7742
112	21	22.7619	21	16.1905	21	30.0952	21	22.5714	21	26.0952	21	92	21	29	21	50.5238	31	28.1613	31	20.9677	31	35.9677	31	28	31	31.6129	31	92.3871	31	29.3226	31	46.3871
114	21	40.2381	21	33.7619	21	45.1905	21	38.7619	21	40.381	21	81.4286	21	31.7143	21	22.5238	29	40.4138	29	35.4483	29	46.1379	29	40.069	29	41.2414	29	74.8621	29	31.4483	29	19.5517
116	21	27	21	26.9524	21	35.1429	21	29.5714	21	29.1429	21	89.619	21	28.8571	21	0	31	27.2903	31	25.9677	31	34.3548	31	28.5806	31	28.6129	31	89.9355	31	29.0645	31	0
126	21	42.6667	21	39.1429	21	51.1429	21	43.8095	21	46.7143	21	86.7619	21	26.4286	21	0.714286	31	41.7742	31	39.8065	31	52.0645	31	44.7097	31	46.6774	31	90.0645	31	26.1613	31	0.483871
127	20	38.1	20	36.25	20	47.5	20	41.35	20	45.4	20	74.8	20	29.3	20	0.35	30	33.0667	30	32.8	30	42.4667	30	37.2	30	42.3	30	75.9	30	29.1333	30	3.4
130	21	45.7143	21	42.1905	21	49.4762	21	45.8571	21	51.1429	21	81.5238	21	36.1905	21	0	31	47.0645	31	42.7419	31	51.9677	31	46.8065	31	51.8065	31	80.129	31	36.1613	31	0
131	19	24.7895	19	22.5263	19	30.0526	19	25.8421	19	30.1579	19	75.7895	19	28.2105	19	38.7368	29	22.2069	29	20.5862	29	28.931	29	24.069	29	28.3103	29	74.3103	29	29.931	29	43.3103
137	21	28.7619	21	22.8571	21	36.4762	21	28.7143	21	33.5238	21	81.3333	21	29.3333	21	40.5238	31	30.9677	31	24.1613	31	39.3871	31	30.8065	31	35.5806	31	80.5484	31	29.0323	31	37.6774
139	21	28.2381	21	22.3333	21	35.0952	21	28.1905	21	33.0476	21	85.2857	21	28.7143	21	41.2381	31	30.6774	31	24	31	38.4194	31	30.5161	31	35.2581	31	82.7097	31	28.5806	31	39.9677
144	21	29.2857	21	24.9048	21	33.8095	21	28.619	21	34.9524	21	71.2857	21	28	21	3.19048	31	30.0323	31	25.129	31	34.4194	31	29.0645	31	34.129	31	69.0968	31	27.2903	31	2.51613
147	21	32.8095	21	29.4762	21	36.1429	21	32.619	21	37.7619	21	92.1429	21	26.1905	21	15.6667	30	32.6333	30	29.2333	30	36.1333	30	32.5	30	37.7	30	90.2333	30	26.4	30	16.0333
151	21	13.0476	21	9.85714	21	16.8571	21	13.0476	21	15.5238	21	68.381	21	26.1905	21	68.8095	28	13.4643	28	10.3214	28	17.25	28	13.4643	28	16.0357	28	64.5	28	26.6071	28	67.8929
154	21	31.9524	21	27.2381	21	36.9048	21	31.8571	21	39.9048	21	68.8571	21	26.4762	21	0.666667	31	35.3226	31	30.5484	31	40.2581	31	34.7419	31	41	31	65.5806	31	27.8065	31	0.516129
155	21	51.6667	21	44.2381	21	57.9524	21	50.0952	21	51.8095	21	71.3333	21	30.3333	21	0.857143	31	50.9032	31	44.9355	31	56.0968	31	50.0968	31	54.8387	31	73.6129	31	30.2903	31	0.612903
158	21	30.4286	21	25.5238	21	34.8095	21	29.4286	21	31.8571	21	87.0476	21	25.5238	21	36.6667	31	35.1613	31	30.2903	31	39.6774	31	33.7419	31	35.3548	31	83.9355	31	25.3548	31	29.5806
159	21	55.5714	21	47.9048	21	62.6667	21	54.1429	21	55.8095	21	90.9524	21	33.381	21	0	31	53.5806	31	45.6129	31	60.9355	31	51.9355	31	53.4839	31	85	31	32.129	31	0
160	20	41.65	20	39.1	20	44.65	20	39.3	20	39.1	20	85.5	20	27.6	20	0	30	41.3333	30	38.6667	30	44.6	30	39.0333	30	38.8667	30	85.1667	30	27.3667	30	0
162	21	52.2857	21	44.1905	21	60.9048	21	52.4286	21	54.4286	21	76.9524	21	28.1905	21	21	31	52.1935	31	43.8387	31	60.4194	31	52.3871	31	54.6129	31	76.1935	31	28.3226	31	21.3226
170	21	43.1905	21	39.381	21	48.381	21	41.5238	21	44	21	87.7619	21	27.619	21	0	31	41.0645	31	37.5484	31	45.6452	31	39.5161	31	42.6774	31	88.4194	31	27.2581	31	0
178	7	49.8571	7	43.8571	7	60.8571	7	47.7143	7	49.1429	7	69.7143	7	33	7	0	7	49.8571	7	43.8571	7	60.8571	7	47.7143	7	49.1429	7	69.7143	7	33	7	0
179	21	13.4762	21	9.33333	21	17.4286	21	13.4286	21	15.7143	21	92.1429	21	25.381	21	69.6667	31	17.3548	31	12.2581	31	23.0323	31	17.3226	31	20.1935	31	89.7097	31	25.8065	31	62.2258
180	21	30.9048	21	26.3333	21	36.6667	21	29.3333	21	29.7619	21	83.619	21	29.381	21	0	31	34.6129	31	29.6129	31	40.4194	31	33.1613	31	33.871	31	86.8387	31	29.8387	31	0
182	21	43.2857	21	35.2381	21	52	21	42.5714	21	48	21	89.8095	21	27.3333	21	20.8095	30	47.6	30	39.3	30	56.3	30	46.9333	30	51.8667	30	83.9	30	27.3333	30	17.1667
187	20	29.4	20	25.75	20	34.3	20	29.25	20	36.8	20	80.05	20	25.7	20	24.55	29	29.7586	29	25.9655	29	35.2759	29	29.6552	29	36.8621	29	66.5172	29	27.6897	29	24.2414
191	20	13.1	20	8.4	20	18.25	20	13.05	20	15.25	20	84.1	20	26.75	20	69.75	25	17	25	11.88	25	23.28	25	16.92	25	19.6	25	75.6	25	27.56	25	62.32
192	21	19.0952	21	14.4286	21	24.4286	21	19	21	21.9048	21	91.5238	21	26.5238	21	56.619	31	17.3226	31	12.8065	31	22.2903	31	17.2581	31	20.0323	31	81.9355	31	26.9032	31	60.3226
198	21	20.4762	21	14.8571	21	26.2381	21	20.381	21	23.5238	21	87.4762	21	26.3333	21	54.9048	31	19.0323	31	14.0645	31	24.6129	31	18.9677	31	21.9032	31	89.0968	31	26.2258	31	58.4839
203	21	52.9524	21	46.1905	21	59	21	51.5714	21	54.8095	21	73.1905	21	28.4286	21	1.33333	31	50.5806	31	43.9032	31	57.129	31	49.0968	31	51.8065	31	74.0968	31	28.1613	31	1.45161
207	21	44.4762	21	38.7143	21	49.8095	21	43.1429	21	46.1429	21	74.5714	21	26.9524	21	1.85714	28	44.6429	28	38.9286	28	50.2143	28	43.3571	28	46.6786	28	65.9286	28	27.0357	28	1.82143
211	21	33.9524	21	27.9048	21	41.9524	21	33.5238	21	39.0476	21	91.9524	21	29.8095	21	24.2381	30	39.1667	30	31.9333	30	46.9	30	39.1667	30	44.5333	30	82.1333	30	30.4	30	19.9667
213	21	16.619	21	11.619	21	22.2381	21	16.5714	21	18.1429	21	96.8571	21	26.6667	21	69.5238	31	14.3871	31	9.96774	31	19.5161	31	14.3548	31	16	31	96.3226	31	26.871	31	71.9355
215	21	34.1429	21	28.7143	21	39.0476	21	31.9524	21	29.2381	21	69.7143	21	28.5714	21	0.047619	30	35.0667	30	30.0667	30	39.6667	30	32.7667	30	29.9333	30	64.4333	30	28.8333	30	0.0333333
219	21	24.0952	21	19.5238	21	29.619	21	24	21	28.0952	21	80.7619	21	25.1429	21	47.3333	30	27.3667	30	22.5	30	33	30	27.2333	30	31.5333	30	77.9667	30	25.6333	30	41.4333
221	21	49.7619	21	40.6667	21	58.8571	21	48.619	21	49.8571	21	95.9524	21	27.7143	21	20.9524	31	53.9355	31	44.1613	31	62.5484	31	52.4839	31	53.2903	31	92.871	31	27.5806	31	14.7742
222	21	18.5238	21	14.8571	21	22.619	21	18.4762	21	21.9524	21	90.0952	21	26.2381	21	56.8571	31	19.2258	31	15.4194	31	23.4839	31	19.1935	31	22.9032	31	81.7097	31	26.1613	31	54.6129
227	20	32.3	20	26.7	20	38.45	20	31.9	20	36.1	20	74.65	20	29.65	20	20.4	30	28.7333	30	24.0333	30	34.3667	30	28.4667	30	32.4	30	72.9667	30	28.5667	30	25.2667
232	21	50.0952	21	43.9048	21	57.0476	21	50.0476	21	59.8571	21	76.2381	21	30.7143	21	0.714286	31	49.2903	31	43.0968	31	55.4839	31	49	31	57.1613	31	76.7419	31	29.9355	31	0.645161
235	21	35.1905	21	28.0952	21	43.8095	21	35.0952	21	38.381	21	80.8571	21	33	21	36.2381	29	34.2414	29	26.5517	29	43.3448	29	34.1724	29	37.7586	29	78.9655	29	34.2414	29	36.4138
236	21	15.1429	21	11.7143	21	18.9524	21	15.1429	21	17.9048	21	70	21	27.2857	21	64.381	31	12.7419	31	9.35484	31	17	31	12.7419	31	15.0645	31	77.3871	31	26.9355	31	70.0968
238	21	34.381	21	27.3333	21	43.1429	21	34.9048	21	37.6667	21	73.3333	21	32.4762	21	39.2381	30	35.3667	30	28.7667	30	43.8	30	35.6333	30	38.8	30	68.4333	30	31.5667	30	35.5667
239	19	61.5789	19	57.0526	19	67.6316	19	62.8421	19	72.2105	19	67.8421	19	37.6316	19	1.52632	29	61.069	29	56.6207	29	67.1379	29	62.1379	29	72.3793	29	69.6897	29	37.2069	29	2.03448
240	21	42.1905	21	36.4286	21	47.619	21	41.8095	21	45.4286	21	73.6667	21	32.1905	21	21.9524	31	45.7742	31	40.1935	31	50.7419	31	45.2258	31	48	31	79.7419	31	32.9677	31	18.2258
245	21	25.381	21	20.8571	21	31.1905	21	25.0476	21	28.8095	21	82.9048	21	28.8095	21	43.9524	26	26.9615	26	22.2308	26	32.6538	26	26.6154	26	30.3846	26	78.7308	26	28.4615	26	41.5385
248	21	8.95238	21	5.14286	21	13.0952	21	8.90476	21	10.7143	21	91.8095	21	27.619	21	79.1905	31	12.5161	31	8	31	17.0645	31	12.4194	31	14.5806	31	88.6452	31	27.4516	31	71.5161
249	18	54.3333	18	43.5	18	64.7222	18	55	18	59.1111	18	76.8333	18	39.7778	18	22.8333	28	41.9643	28	32.5357	28	52.5714	28	42.3571	28	46.25	28	82.9643	28	36.5357	28	35.25
250	21	7.09524	21	3.71429	21	11.381	21	7.09524	21	8.19048	21	84.8095	21	25.4286	21	83.7619	31	7.41935	31	4.19355	31	11.2258	31	7.41935	31	8.58065	31	73.6452	31	25.5161	31	82.8387
252	20	31	20	21.75	20	40.4	20	30.85	20	34.35	20	75.35	20	31.15	20	43.9	30	26.3333	30	18.3333	30	35	30	26.2333	30	29.6667	30	74.0333	30	30.2667	30	48.7667
256	20	20.8	20	16.8	20	24.45	20	20.8	20	24.5	20	79.8	20	30.15	20	53.05	29	24.6207	29	20.1034	29	29	29	24.5862	29	28.9655	29	70.7241	29	30.5517	29	45.1034
261	21	37.3333	21	30.8095	21	46.5714	21	42.0952	21	42.8571	21	86.3333	21	29.7619	21	3.19048	31	35.1613	31	27.9355	31	43.1935	31	44.2903	31	44.7742	31	83.4839	31	31.0323	31	3.06452
263	21	45.619	21	38.619	21	52.2857	21	44.8571	21	50.3333	21	81.4762	21	28.2857	21	3.95238	31	46.1935	31	39.2903	31	53.129	31	45.0968	31	49.4194	31	79.9355	31	28.0968	31	3.09677
265	18	7.16667	18	4.72222	18	10.6111	18	7.16667	18	8.5	18	78	18	26.9444	18	83.1667	28	6.92857	28	4.14286	28	10.4643	28	6.92857	28	8.17857	28	72.0714	28	27.5	28	83.7143
266	21	11.4286	21	8.2381	21	14.619	21	11.4286	21	13.5238	21	80.7143	21	28.2381	21	72.7143	31	14.1935	31	9.96774	31	17.9677	31	14.1613	31	16.8065	31	68.7742	31	28.3871	31	66.3226
267	21	57	21	49.5238	21	63.619	21	56.5714	21	58.4762	21	86.381	21	29.6667	21	0	31	52.5484	31	45.2903	31	58.3226	31	52.2581	31	57.0323	31	88.7097	31	29.1935	31	0
268	21	38.5714	21	33.6667	21	43.1429	21	37.9048	21	43.381	21	87.0952	21	27.2381	21	2.57143	31	38.5161	31	33.5484	31	43.0323	31	37.4516	31	41.8387	31	89.7097	31	26.5161	31	1.77419
270	20	45.6	20	40.95	20	51.45	20	44.25	20	45.65	20	74.05	20	37.05	20	0	30	41.5	30	37.1333	30	46.8	30	40.2	30	42.6333	30	80.6333	30	33.8333	30	0
273	14	40.2143	14	36.4286	14	44.5714	14	38	14	34.9286	14	77.9286	14	30.7857	14	0	24	41.8333	24	37.5833	24	47.9167	24	39.5833	24	37.2083	24	79.0417	24	30.6667	24	0
277	21	35.9048	21	32.9524	21	39.4286	21	34.0952	21	35	21	73.8571	21	27.381	21	0	31	36.5484	31	32.7419	31	41.6452	31	34.8065	31	35.9677	31	74.7097	31	28.871	31	0
278	21	30.5714	21	26.9048	21	34.9524	21	30.1429	21	37.5238	21	72.5714	21	27.4762	21	5.04762	27	29.4074	27	25.9259	27	33.963	27	29.0741	27	36.7407	27	73.2593	27	28.4444	27	5.92593
282	21	39.9048	21	35.0952	21	45.2381	21	39.0952	21	44.1429	21	78.7143	21	28.1905	21	9.14286	31	35.0968	31	31.1613	31	39.4194	31	34.5484	31	40.0645	31	81.9355	31	27.9355	31	14.8387
283	19	8.42105	19	4.15789	19	13	19	8.42105	19	9.63158	19	79.2632	19	27.1053	19	83.1579	28	9.85714	28	5.89286	28	14.0714	28	9.85714	28	11.4643	28	71.6786	28	27.4643	28	78.7143
284	21	31.0952	21	27	21	35.0476	21	31.4286	21	35.8571	21	93.0476	21	27	21	27.8571	29	30.3793	29	26.069	29	34.7931	29	30.5862	29	35.1724	29	81.3448	29	27.1034	29	29.069
286	21	53.619	21	45.7143	21	61.7619	21	51.8095	21	55	21	74.4286	21	31.619	21	0	31	49.0968	31	43.2581	31	55.129	31	47.871	31	55.7419	31	76.4194	31	30.6452	31	0
